# Supplementary material for: Synthesis and near-infrared photothermal conversion of Cp*Rh-based [2]-catenanes in trapezoidal metallacycles
Source: Royal Society of Chemistry journal article supplement (doi:10.1039/d4qi01288g), 2024-01-01
Supplement: d4qi01288g1.pdf [file d4qi01288g1.pdf]

## Electronic Supporting Information (ESI)

### Synthesis and Near-Infrared Photothermal Conversion of Cp\*Rh-Based [2]-Catenanes in Trapezoidal Metallacycle

Pan-Pan Hua,<sup>a</sup> Hui-Jun Feng,<sup>a,b\*</sup> Xiang Gao,<sup>b</sup> Li-Fang Zhang<sup>a</sup> and Guo-Xin Jin<sup>b\*</sup>

<sup>a</sup> *Key Laboratory of Magnetic Molecules and Magnetic Information Materials of the Ministry of Education, School of Chemistry and Material Science, Shanxi Normal University, Taiyuan 030031, China*

<sup>b</sup> *Shanghai Key Laboratory of Molecular Catalysis and Innovative Materials; State Key Laboratory of Molecular Engineering of Polymers, Department of Chemistry, Fudan University, Shanghai 200433, P. R. China.*

\*E-mail: [gxjin@fudan.edu.cn](mailto:gxjin@fudan.edu.cn).

## **Table of Contents**

|                                                               |            |
|---------------------------------------------------------------|------------|
| <b>1. Experimental Procedures.....</b>                        | <b>S3</b>  |
| <b>2. NMR spectra.....</b>                                    | <b>S9</b>  |
| <b>3. ESI-MS spectra.....</b>                                 | <b>S22</b> |
| <b>4. Near-infrared photothermal conversion research.....</b> | <b>S25</b> |
| <b>5. X-ray crystallography details.....</b>                  | <b>S29</b> |

## 1. Experimental Procedures

### Synthetic Procedures:

#### Synthesis of L1.

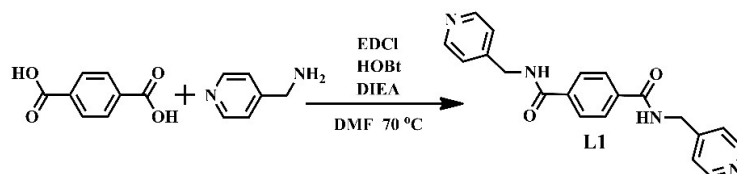

Scheme 1. Synthesis of L1.

Terephthalic acid (132.9 mg, 0.8 mmol), 4-Pyridinylmethanamine (162.4  $\mu$ L, 1.6 mmol), HOBt (0.10 g, 0.8 mmol), EDCI (0.13 g, 0.8 mmol), and DIEA (0.4 mL, 2.0 mmol) were mixed in DMF (10 mL) and the mixture was stirred at 70 °C. After 2 d, the solution was concentrated by evaporation. Adding a saturated solution of sodium bicarbonate to the above reactants yields a solid, which was then filtered to obtain **L1** (238.3 mg; Yield: 86%). Anal. calcd for C<sub>20</sub>H<sub>18</sub>N<sub>4</sub>O<sub>2</sub>: C, 69.35; H, 5.24; N, 16.17. Found: C, 69.45; H, 5.36; N, 16.24. <sup>1</sup>H NMR (600 MHz, DMSO, ppm)  $\delta$  = 9.28 (s, 2H), 8.52 (s, 4H), 8.03 (s, 4H), 7.33 (s, 4H), 4.54 (s, 4H). <sup>13</sup>C NMR (151 MHz, DMSO)  $\delta$  166.36 (s), 150.04 (s), 148.88 (s), 136.94 (s), 127.87 (s), 122.64 (s), 42.31 (s).

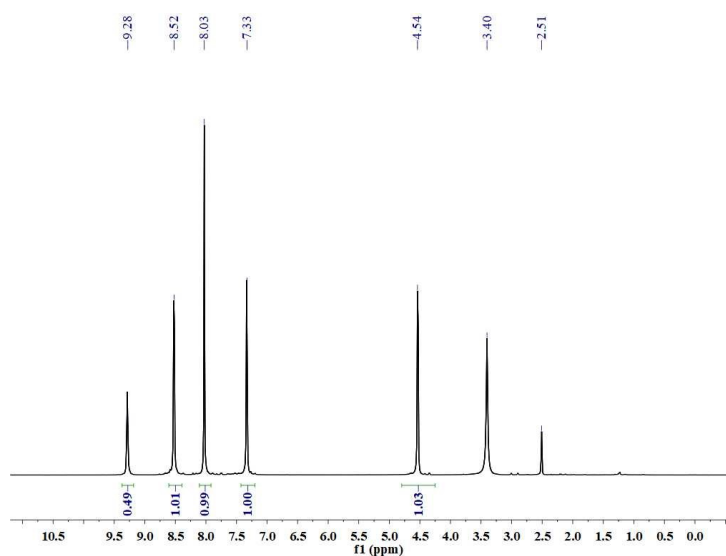

Fig. S1 <sup>1</sup>H NMR (600 MHz, DMSO-*d*<sub>6</sub>, ppm) for L1.

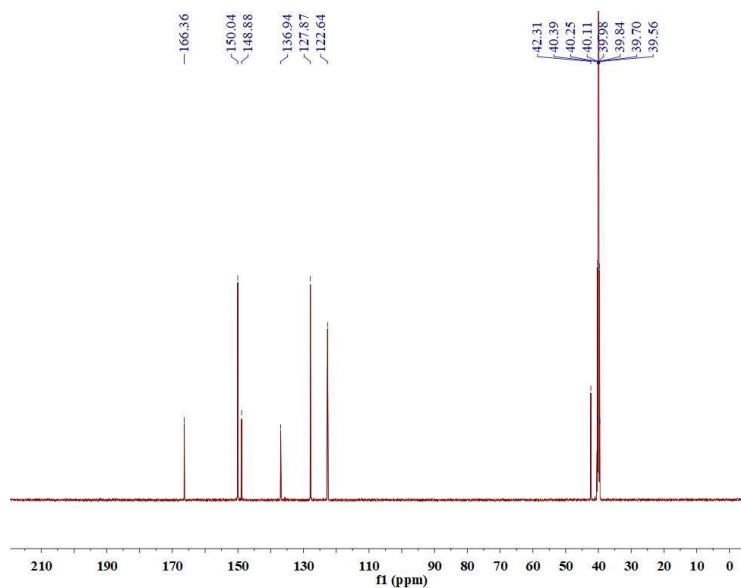

**Fig. S2**  $^{13}\text{C}$  NMR (151 MHz,  $\text{DMSO-}d_6$ , ppm) for **L1**.

### Synthesis of **L2**.

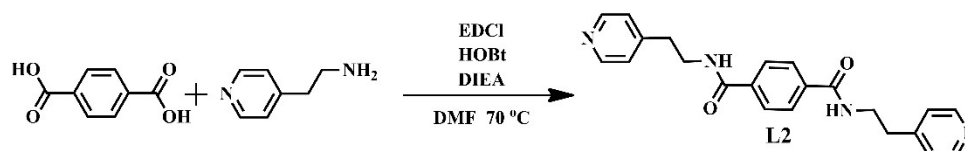

**Scheme 2.** Synthesis of **L2**.

Terephthalic acid (132.9 mg, 0.8 mmol), 4-(2-Aminoethyl)pyridine (191.0  $\mu\text{L}$ , 1.6 mmol), HOBt (0.10 g, 0.8 mmol), EDCI (0.13 g, 0.8 mmol), and DIEA (0.4 mL, 2.0 mmol) were mixed in DMF (10 mL) and the mixture was stirred at 70 °C. After 2 d, the solution was concentrated by evaporation. By adding a saturated solution of sodium bicarbonate to the reactants mentioned above, a solid is formed. This solid was subsequently filtered to obtain **L2** (245.5 mg; Yield: 82%). Anal. calcd for  $\text{C}_{22}\text{H}_{22}\text{N}_4\text{O}_2$ : C, 70.57; H, 5.92; N, 14.96. Found: C, 70.42; H, 5.86; N, 14.82.  $^1\text{H}$  NMR (600 MHz, DMSO, ppm)  $\delta$  = 8.70 (s, 2H), 8.47 (s, 4H), 7.87 (s, 4H), 7.27 (s, 4H), 3.55 (s, 4H),

2.89 (s, 4H).  $^{13}\text{C}$  NMR (151 MHz, DMSO)  $\delta$  = 166.11 (s), 149.92 (s), 148.88 (s), 137.13 (s), 127.57 (s), 124.73 (s), 40.51 (s), 34.60 (s).

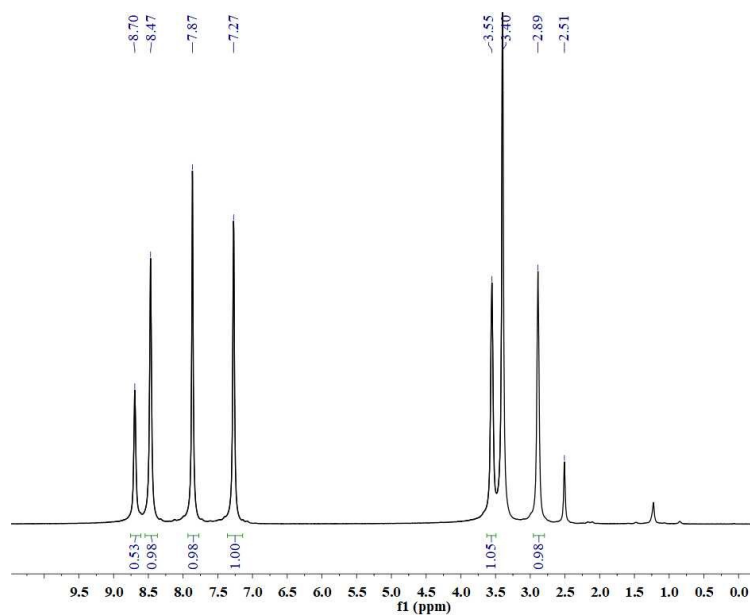

Fig. S3  $^1\text{H}$  NMR (600 MHz, DMSO- $d_6$ , ppm) for L2.

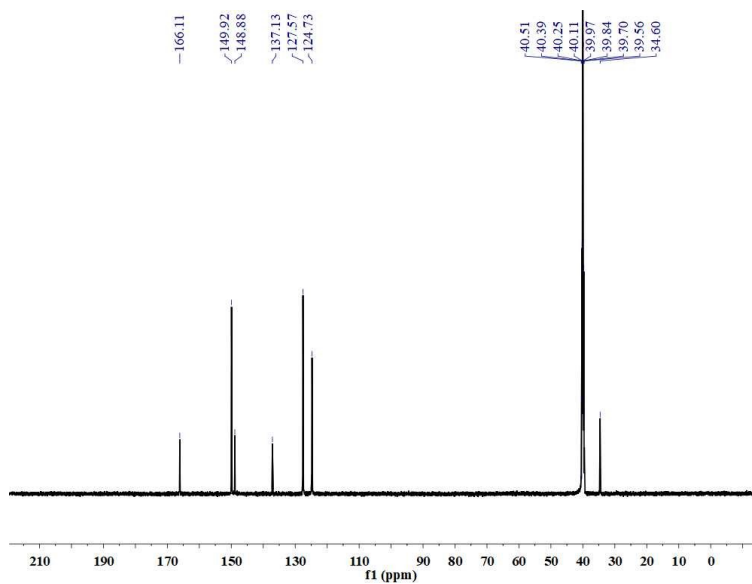

Fig. S4  $^{13}\text{C}$  NMR (151 MHz, DMSO- $d_6$ , ppm) for L2.

### Synthesis of L3.

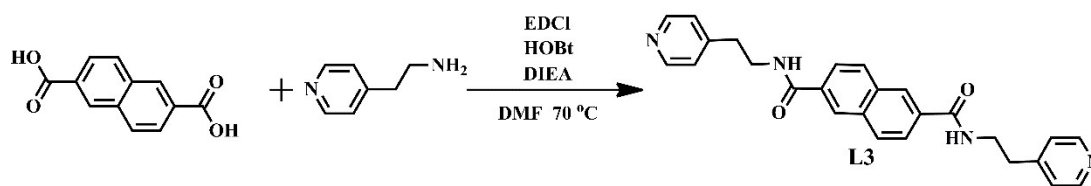

**Scheme 3.** Synthesis of **L3**.

Biphenyl-4,4'-dicarboxylic acid (193.8 mg, 0.8 mmol), 4-(2-Aminoethyl)pyridine (191.0  $\mu$ L, 1.6 mmol), HOBt (0.10 g, 0.8 mmol), EDCI (0.13 g, 0.8 mmol), and DIEA (0.4 mL, 2.0 mmol) were mixed in DMF (10 mL) and the mixture was stirred at 70 °C. After 2 d, the solution was concentrated by evaporation. By adding a saturated solution of sodium bicarbonate to the reactants mentioned above, a solid is formed. This solid was subsequently filtered to obtain **L3** (295.4 mg; Yield: 87%). Anal. calcd for  $C_{26}H_{24}N_4O_2$ : C, 73.56; H, 5.70; N, 13.20. Found: C, 73.48; H, 5.81; N, 13.42.  $^1H$  NMR (600 MHz, DMSO, ppm)  $\delta$  = 8.81 (s, 2H), 8.48 (d,  $J$  = 3.6 Hz, 4H), 8.43 (s, 2H), 8.08 (d,  $J$  = 8.4 Hz, 2H), 7.95 (d,  $J$  = 8.4 Hz, 2H), 7.31 (d,  $J$  = 4.2 Hz, 4H), 3.61 (d,  $J$  = 5.9 Hz, 4H), 2.93 (t,  $J$  = 6.8 Hz, 4H).  $^{13}C$  NMR (151 MHz, DMSO)  $\delta$  166.59 (s), 149.96 (s), 148.91 (s), 133.73 (s), 129.43 (s), 127.54 (s), 125.30 (s), 124.75 (s), 40.42 (s), 34.68 (s).

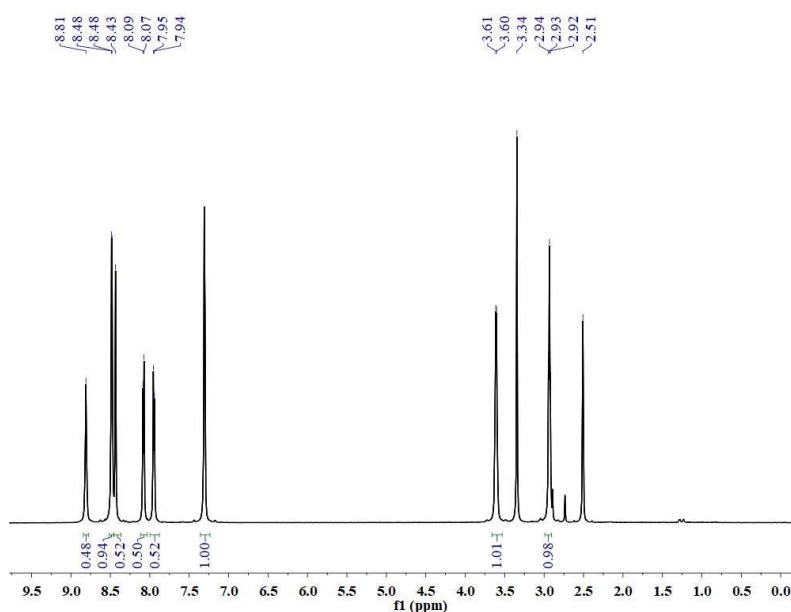

**Fig. S5**  $^1H$  NMR (600 MHz, DMSO- $d_6$ , ppm) for **L3**.

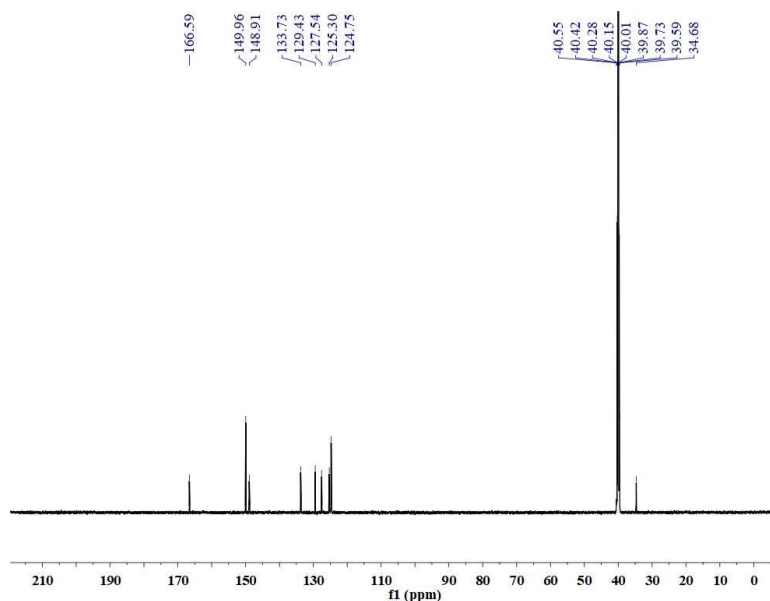

Fig. S6  $^{13}\text{C}$  NMR (151 MHz,  $\text{DMSO-}d_6$ , ppm) for L3.

#### Synthesis of L4.

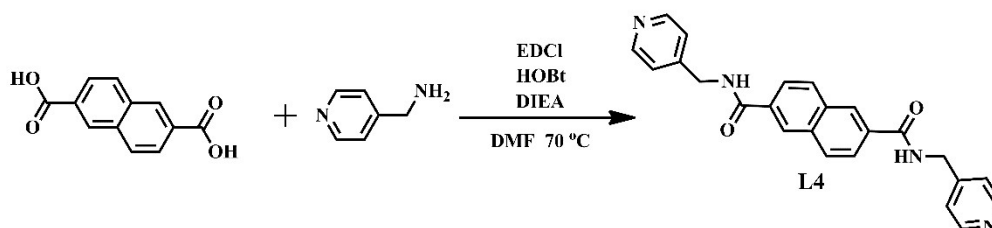

Scheme 4. Synthesis of L4.

Biphenyl-4,4'-dicarboxylic acid (193.8 mg, 0.8 mmol), 4-Pyridinylmethanamine (162.4  $\mu\text{L}$ , 1.6 mmol), HOBT (0.10 g, 0.8 mmol), EDCI (0.13 g, 0.8 mmol), and DIEA (0.4 mL, 2.0 mmol) were mixed in DMF (10 mL) and the mixture was stirred at 70  $^{\circ}\text{C}$ . After 2 d, the solution was concentrated by evaporation. By adding a saturated solution of sodium bicarbonate to the reactants mentioned above, a solid is formed. This solid was subsequently filtered to obtain L4 (269.6 mg; Yield: 85%). Anal. calcd for  $\text{C}_{24}\text{H}_{20}\text{N}_4\text{O}_2$ : C, 72.71; H, 5.08; N, 14.13. Found: C, 72.81; H, 5.15; N, 14.37.  $^1\text{H}$  NMR (600 MHz,  $\text{DMSO}$ , ppm)  $\delta$  = 9.38 (t,  $J$  = 5.9 Hz, 2H), 8.59 (s, 4H), 8.53 (d,  $J$  = 5.7 Hz, 2H), 8.16 (d,  $J$  = 8.5 Hz, 2H), 8.06 (d,  $J$  = 9.6 Hz, 2H), 7.37 (d,  $J$  = 5.7 Hz, 4H), 4.58

(d,  $J = 5.9$  Hz, 4H).  $^{13}\text{C}$  NMR (151 MHz, DMSO)  $\delta$  166.89 (s), 150.05 (s), 148.97 (s), 133.91 (s), 133.43 (s), 129.62 (s), 127.88 (s), 125.42 (s), 122.67 (s), 42.38 (s).

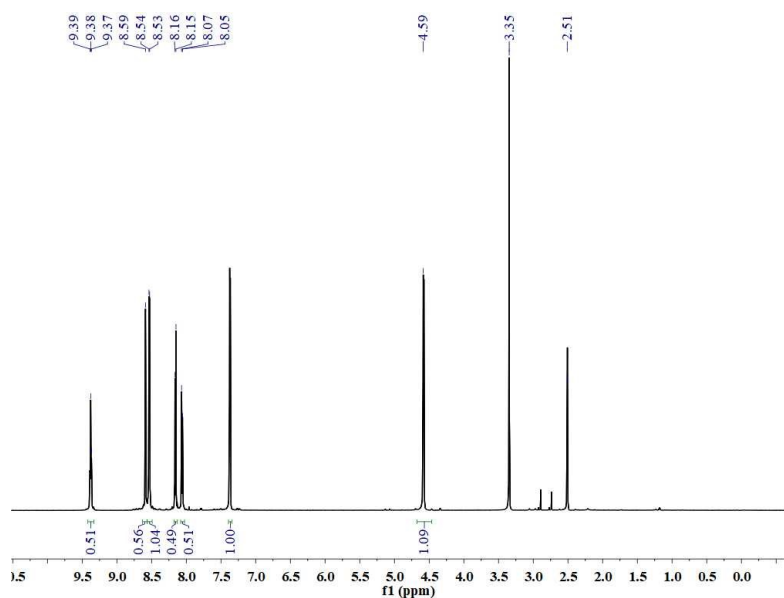

**Fig. S7**  $^1\text{H}$  NMR (600 MHz, DMSO- $d_6$ , ppm) for L4.

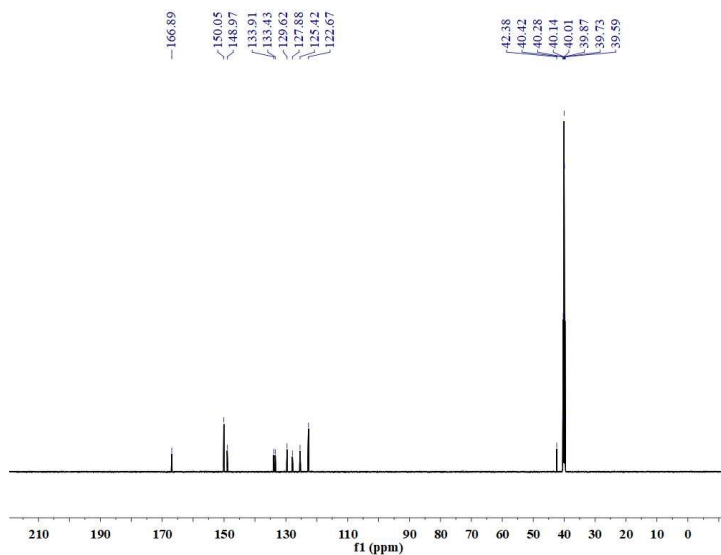

**Fig. S8**  $^{13}\text{C}$  NMR (151 MHz, DMSO- $d_6$ , ppm) for L4.



## 2. NMR Data

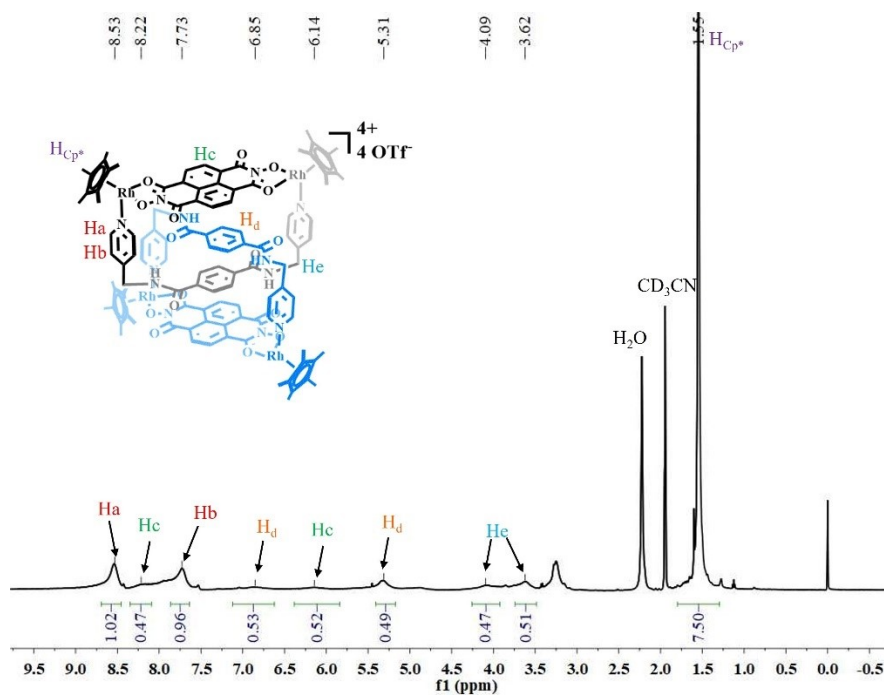

Fig. S9 <sup>1</sup>H NMR at 300K (600 MHz, CD<sub>3</sub>CN, ppm) for 1.

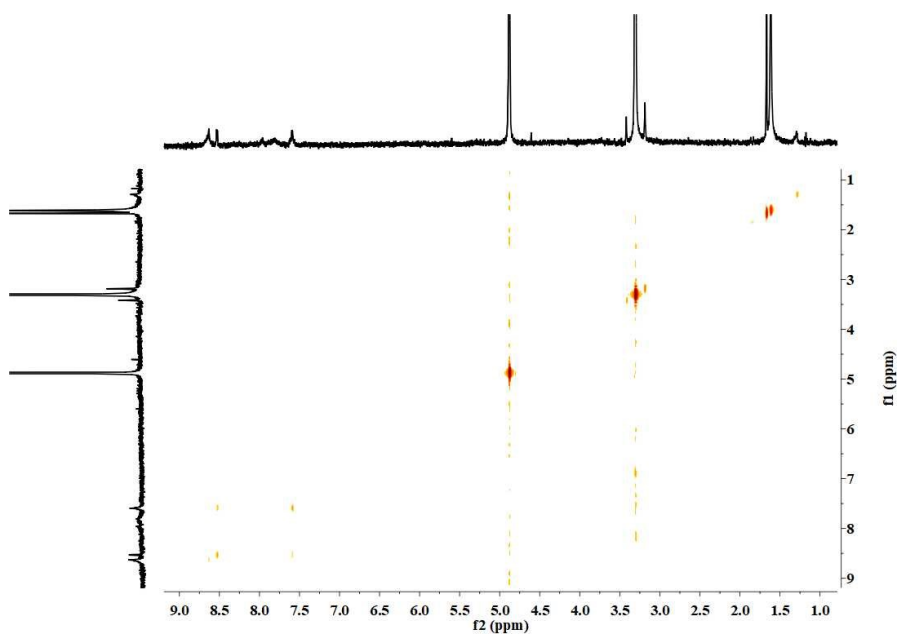

Fig. S10 <sup>1</sup>H - <sup>1</sup>H COSY NMR spectrum of 1 (600 MHz, CD<sub>3</sub>CN) at 300K.

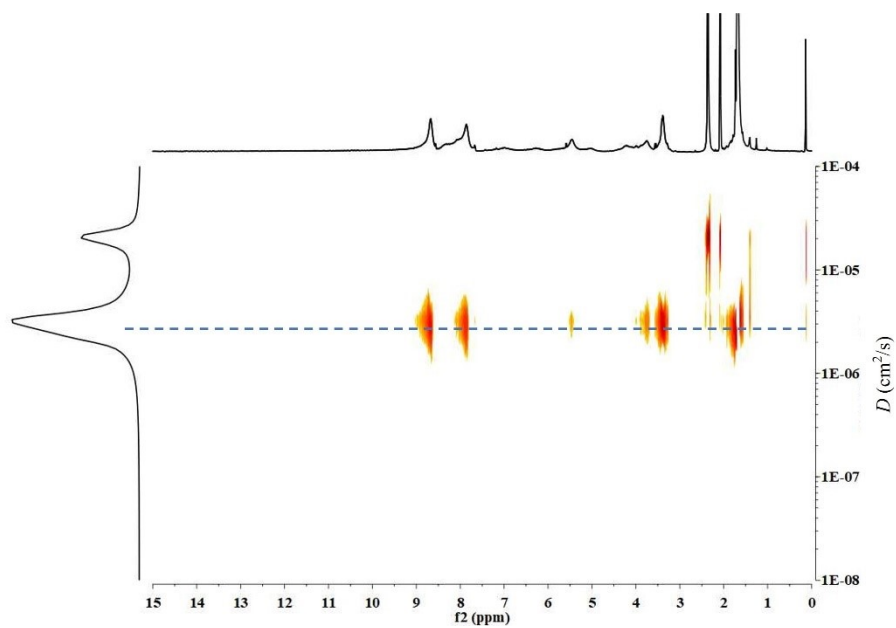

**Fig. S11:**  $^1\text{H}$  DOSY NMR spectrum of **1** (600 MHz,  $\text{CD}_3\text{CN}$ ) at 300K.

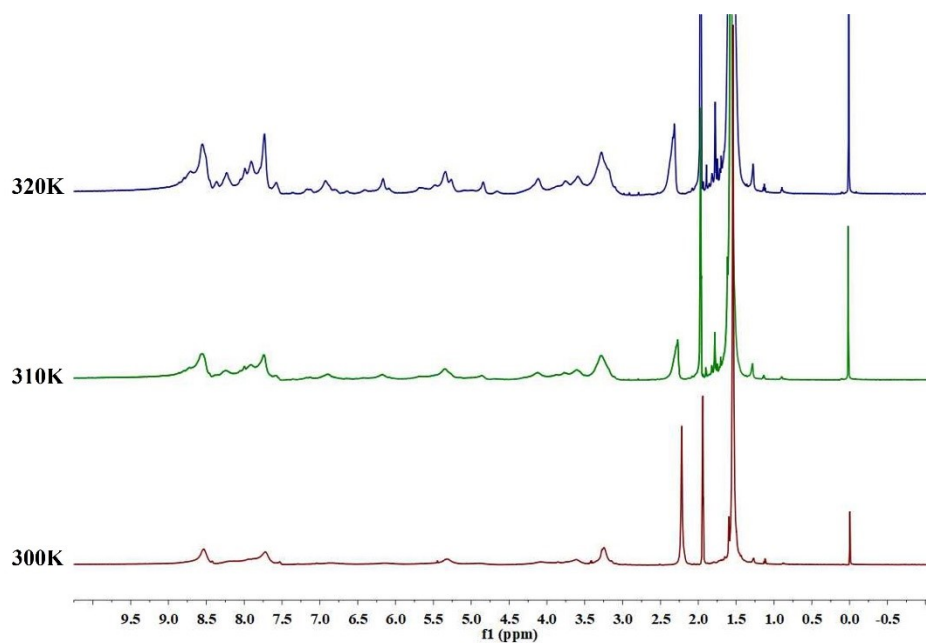

**Fig. S12**  $^1\text{H}$  NMR at different temperatures (600 MHz,  $\text{CD}_3\text{CN}$ , ppm) for **1**.

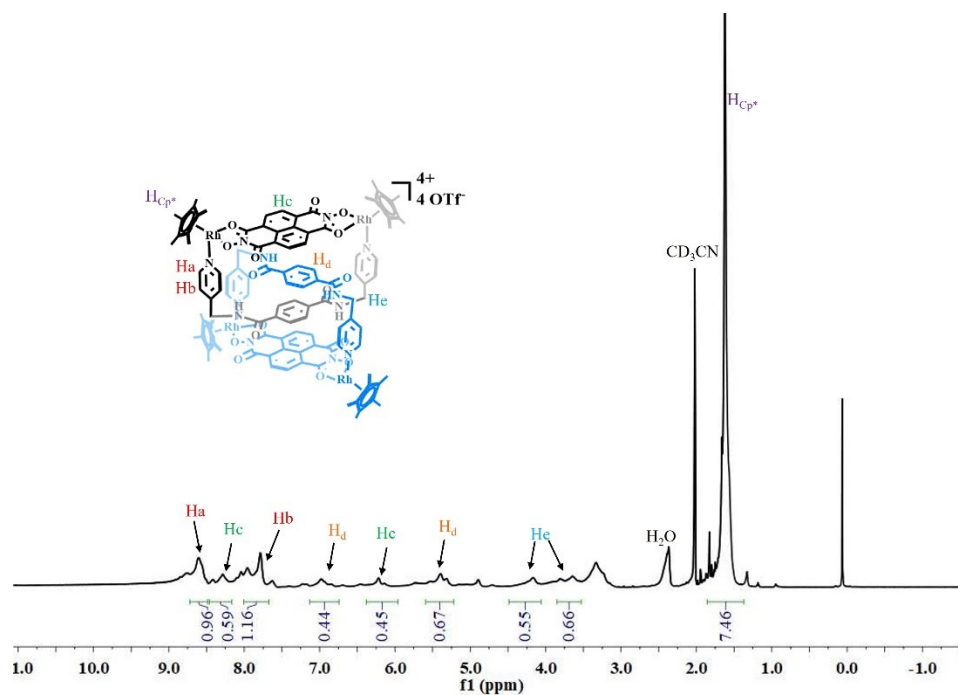

**Fig. S13**  $^1H$  NMR at 320K (600 MHz,  $CD_3CN$ , ppm) for **1**.

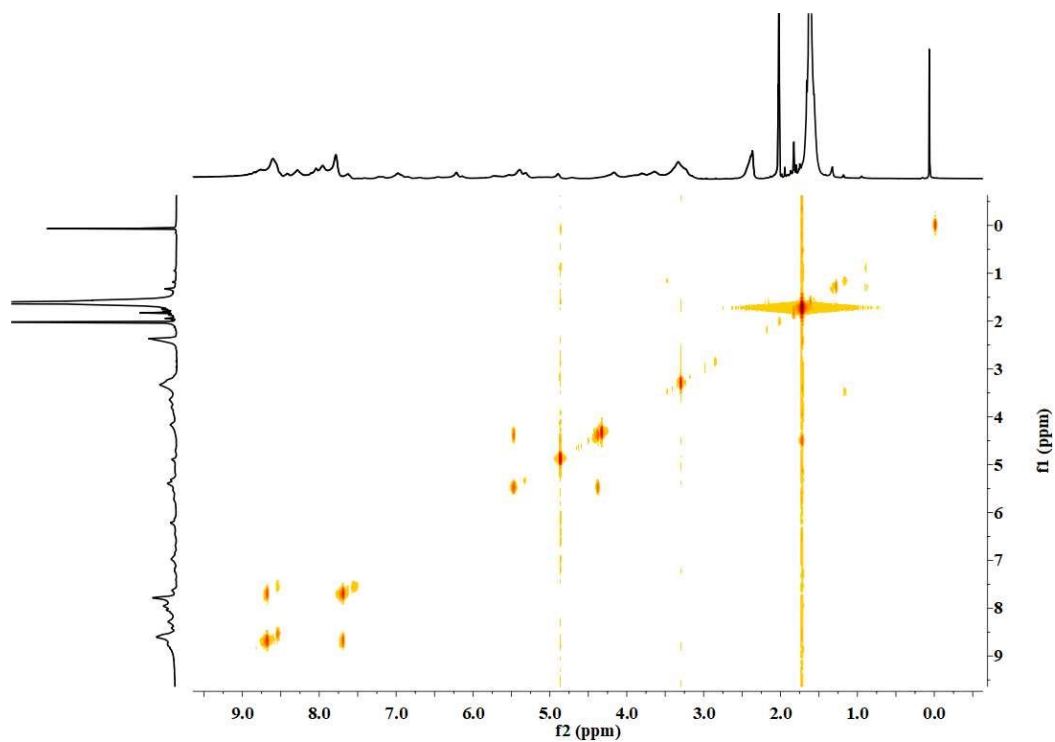

**Fig. S14**  $^1H$  -  $^1H$  COSY NMR spectrum of **1** (600 MHz,  $CD_3CN$ ) at 320K.

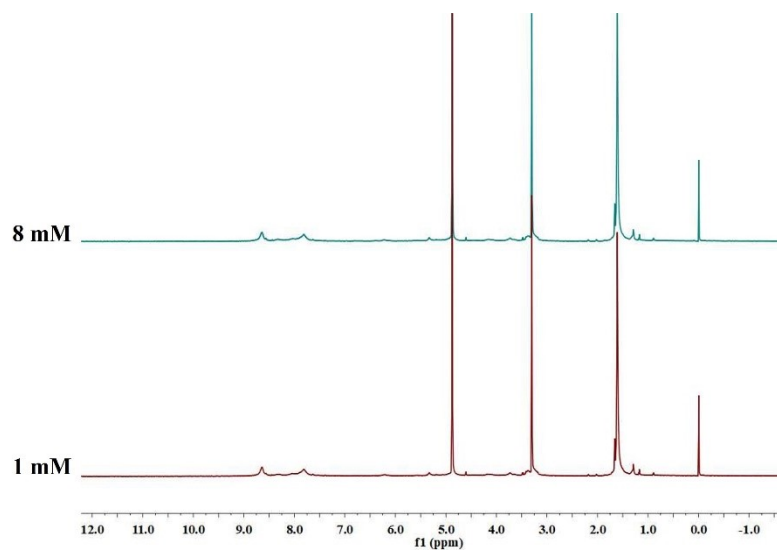

Fig. S15  $^1\text{H}$  NMR (600 MHz,  $\text{CD}_3\text{CN}$ , ppm) for **1** at 1 mM and 8 mM.

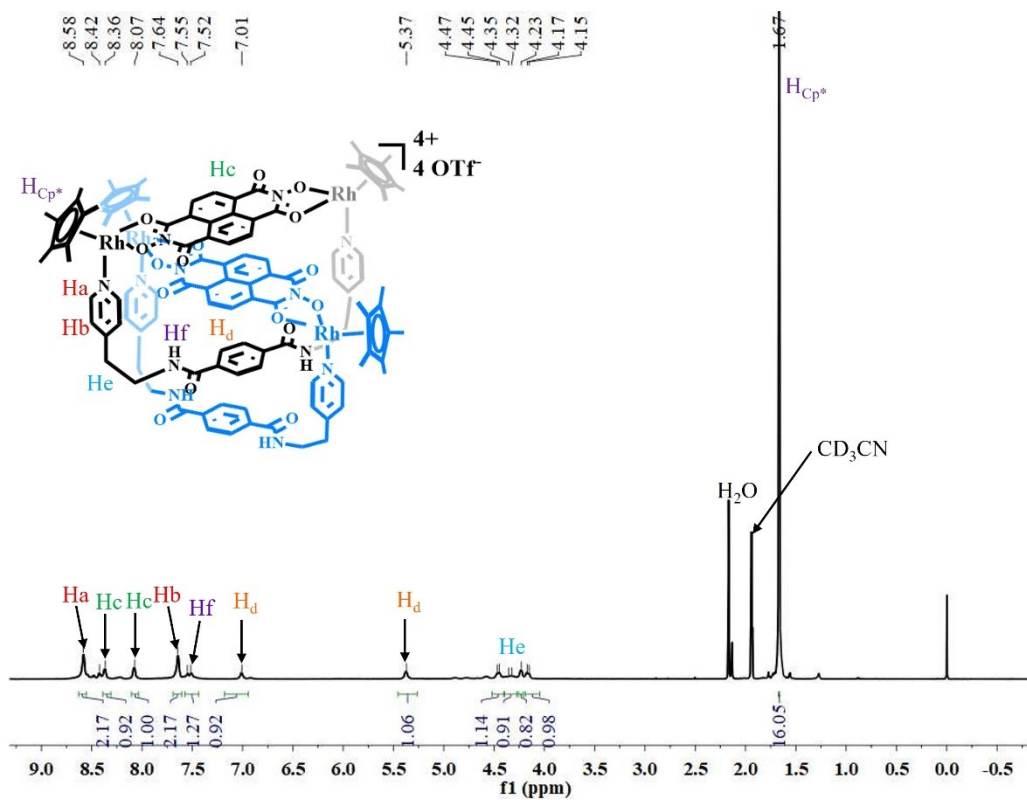

Fig. S16  $^1\text{H}$  NMR (600 MHz,  $\text{CD}_3\text{CN}$ , ppm) at 300k for **2**.

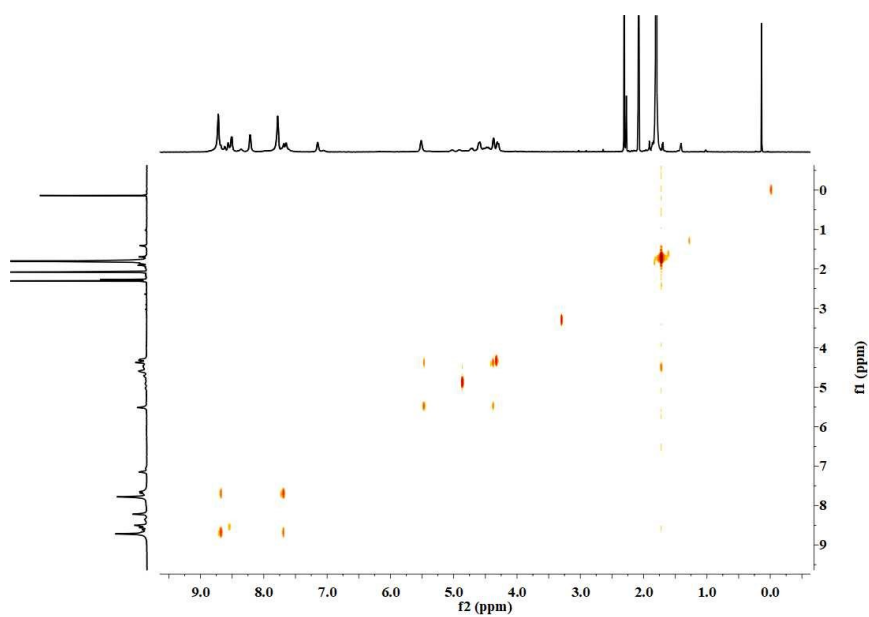

**Fig. S17**  $^1\text{H}$  -  $^1\text{H}$  COSY NMR spectrum of **2** (600 MHz,  $\text{CD}_3\text{CN}$ , 300K).

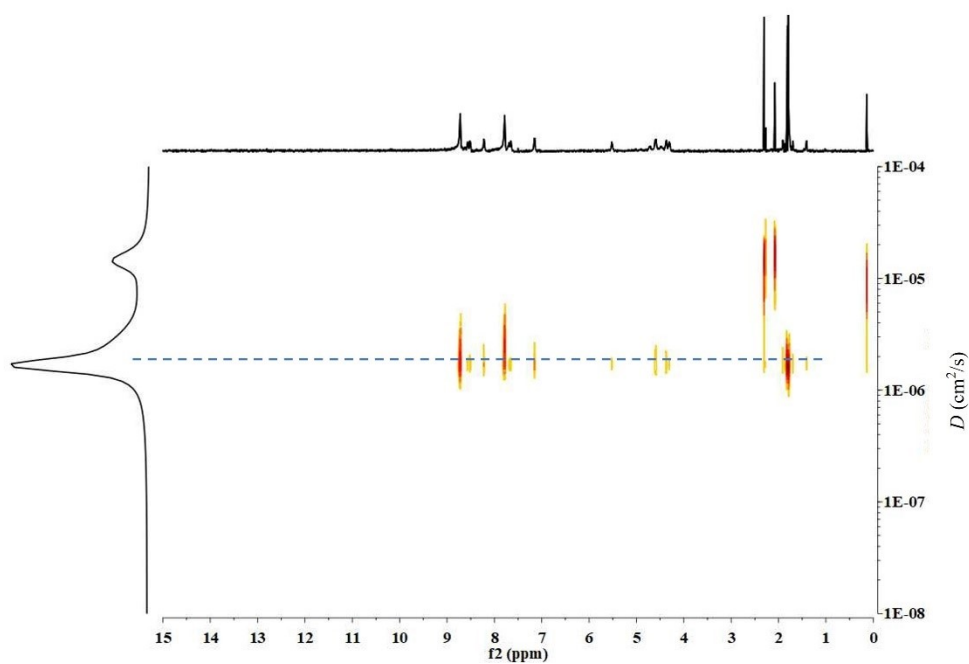

**Fig. S18:**  $^1\text{H}$  DOSY NMR spectrum of **2** (600 MHz,  $\text{CD}_3\text{CN}$ , 300K).

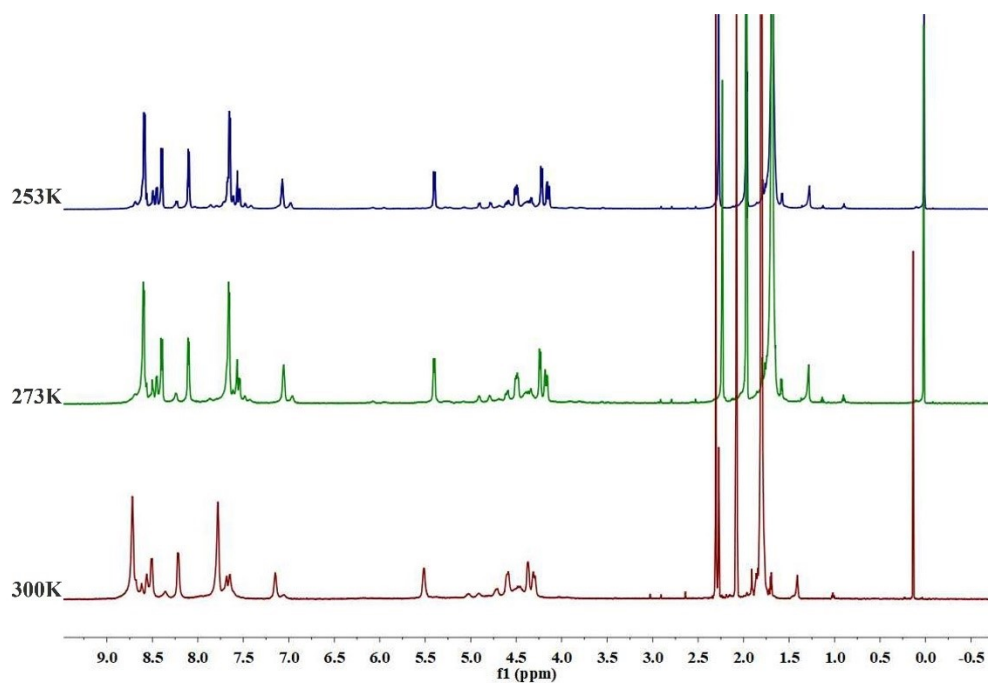

Fig. S19  $^1\text{H}$  NMR at different temperatures (600 MHz,  $\text{CD}_3\text{CN}$ , ppm) for **2**.

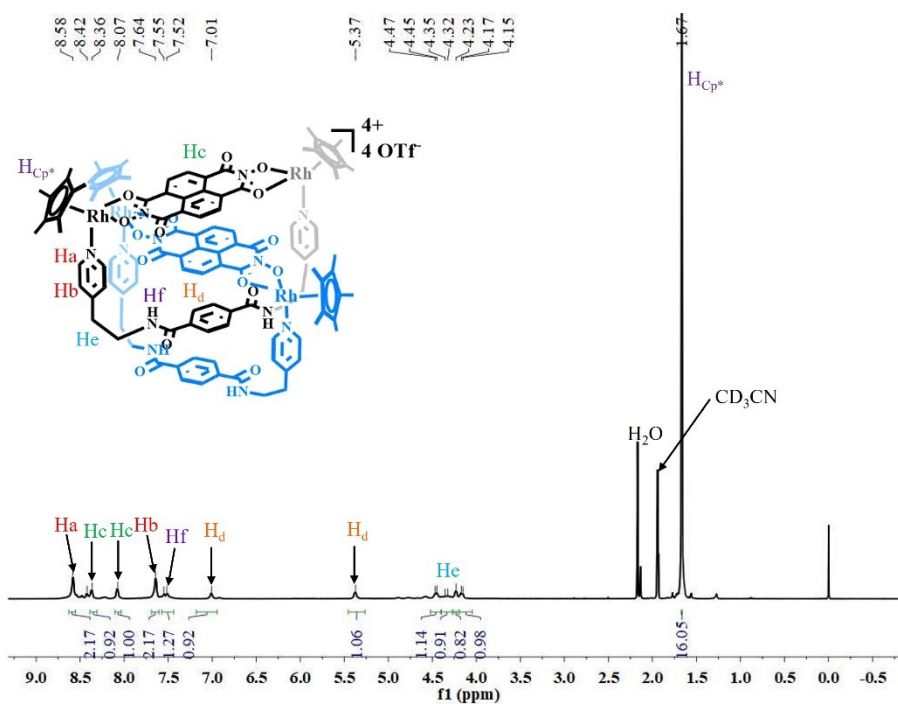

Fig. S20  $^1\text{H}$  NMR (600 MHz,  $\text{CD}_3\text{CN}$ , ppm) at 253k for **2**.

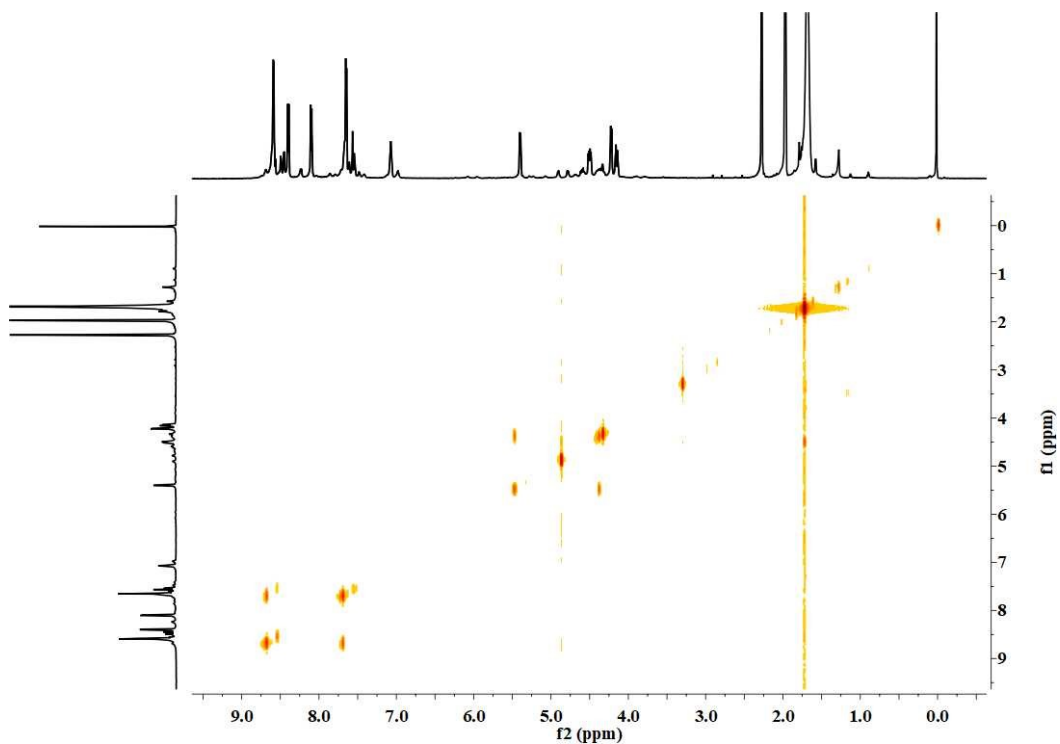

**Fig. S21**  $^1\text{H}$  -  $^1\text{H}$  COSY NMR spectrum of **2** (600 MHz,  $\text{CD}_3\text{CN}$ , 253K).

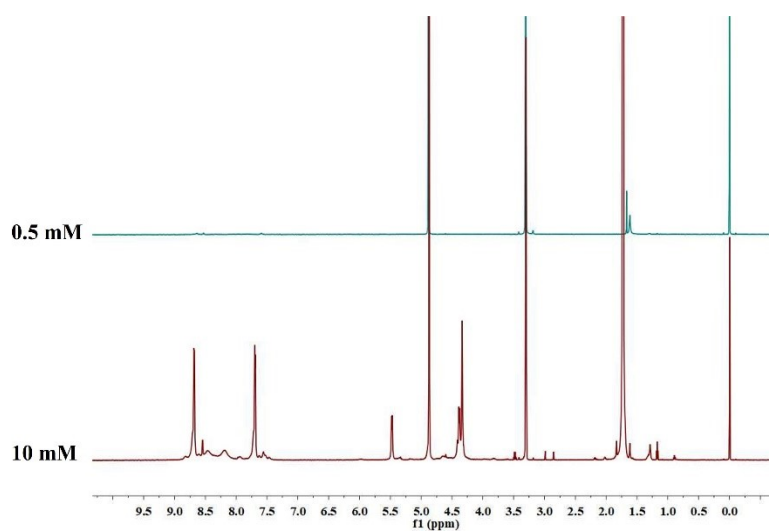

**Fig. S22**  $^1\text{H}$  NMR (600 MHz,  $\text{CD}_3\text{CN}$ , ppm) for **2** at 10mM and 0.5mM.

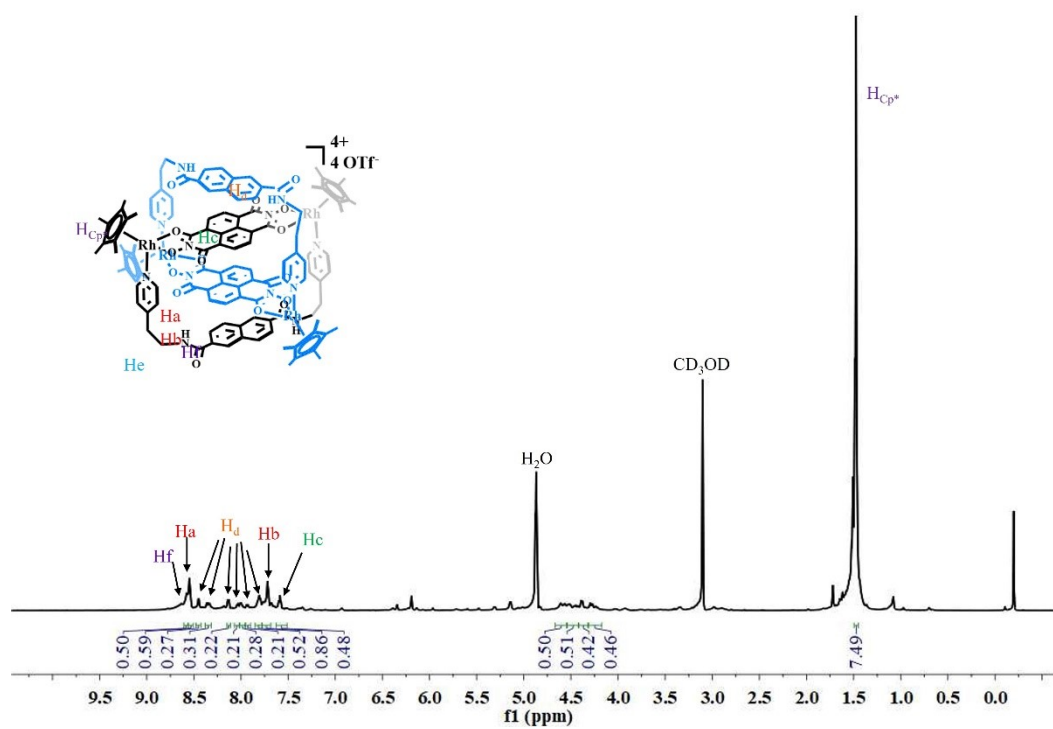

Fig. S23  $^1\text{H}$  NMR (600 MHz,  $\text{CD}_3\text{OD}$ , ppm, 300K) for **3**.

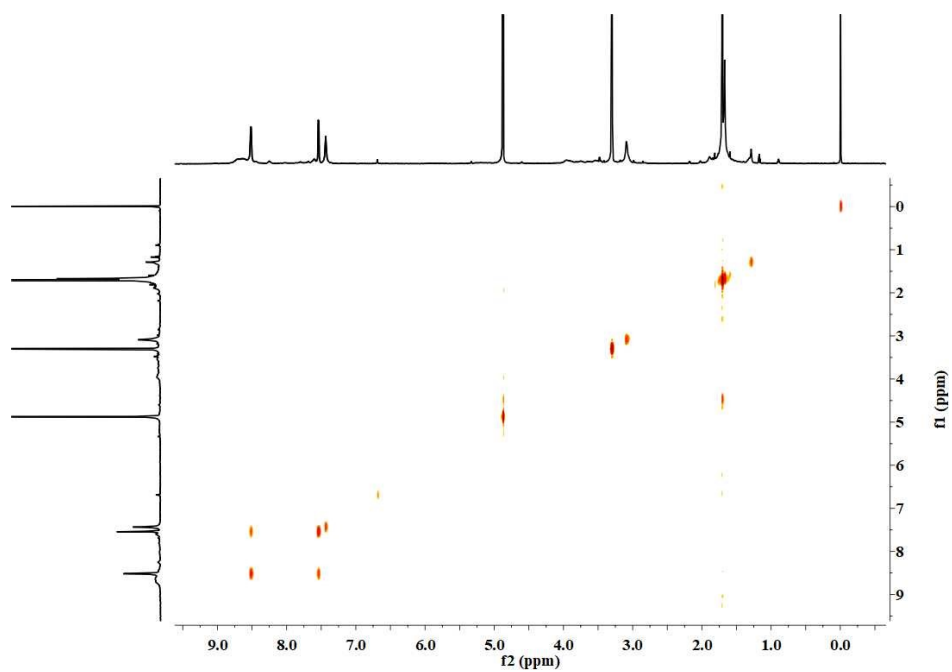

Fig. S24  $^1\text{H}$  -  $^1\text{H}$  COSY NMR spectrum of **3** (600 MHz,  $\text{CD}_3\text{OD}$ , 300K).



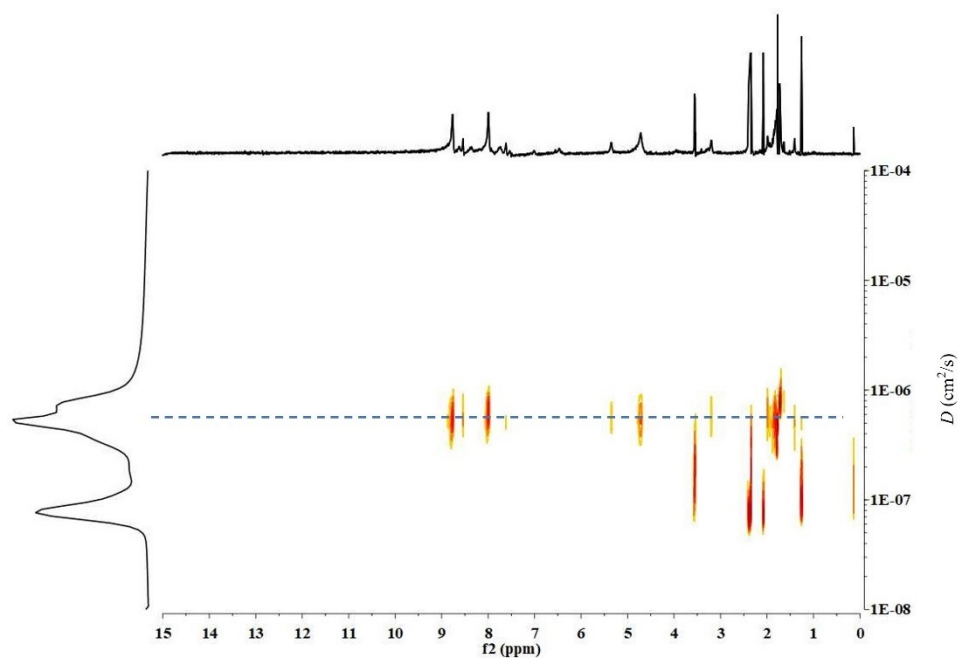

**Fig. S25:**  $^1\text{H}$  DOSY NMR spectrum of **3** (600 MHz,  $\text{CD}_3\text{OD}$ , 300k).

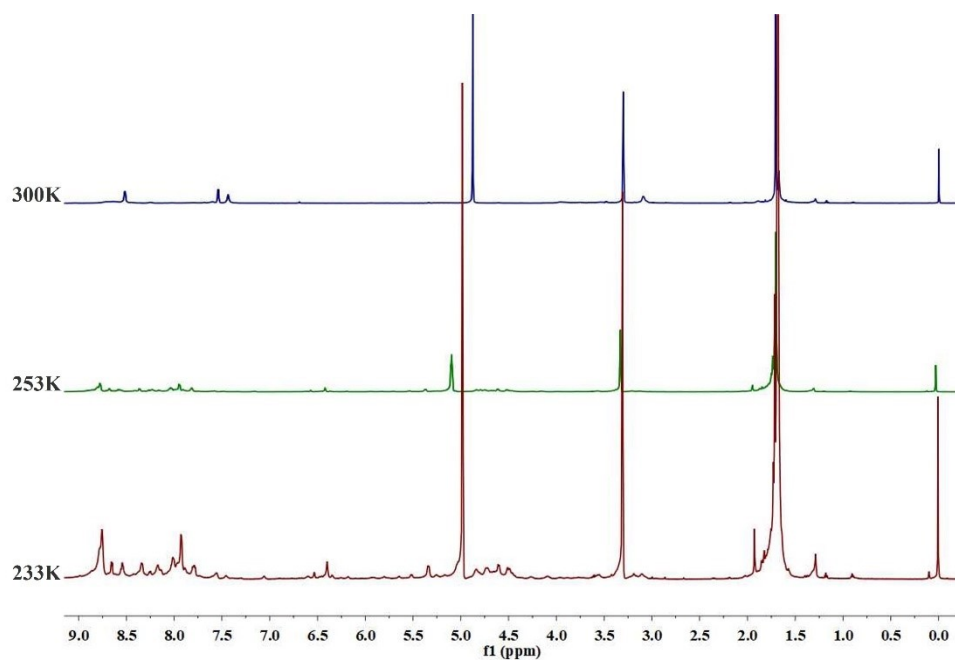

**Fig. S26**  $^1\text{H}$  NMR at different temperatures (600 MHz,  $\text{CD}_3\text{OD}$ , ppm) for **3**.

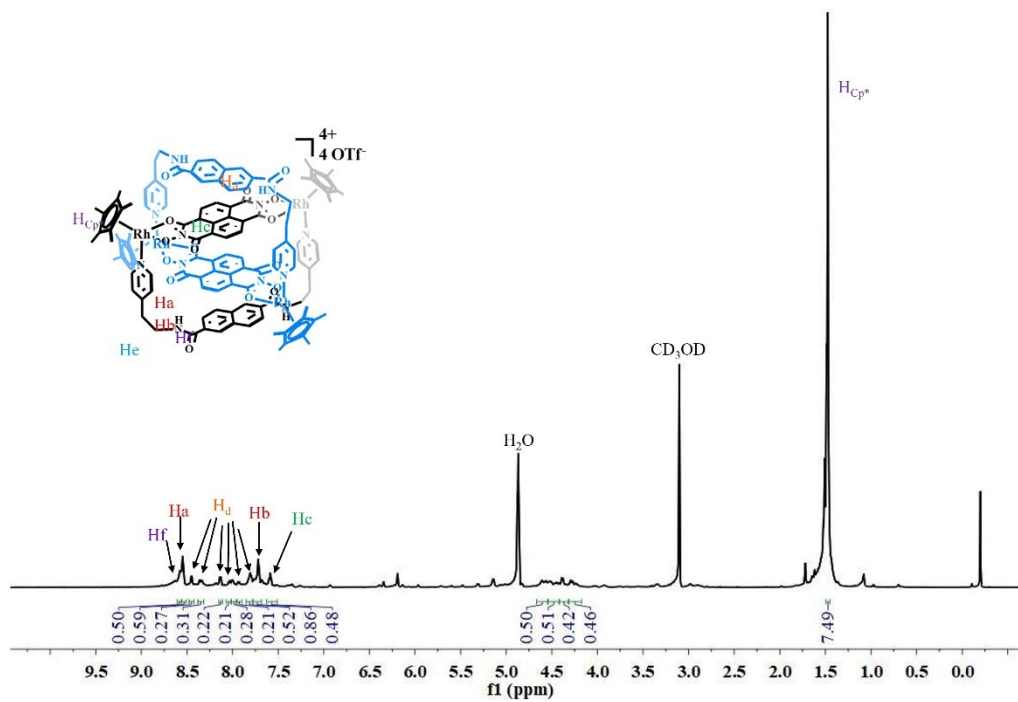

Fig. S27  $^1\text{H}$  NMR (600 MHz,  $\text{CD}_3\text{OD}$ , ppm, 233K) for **3**.

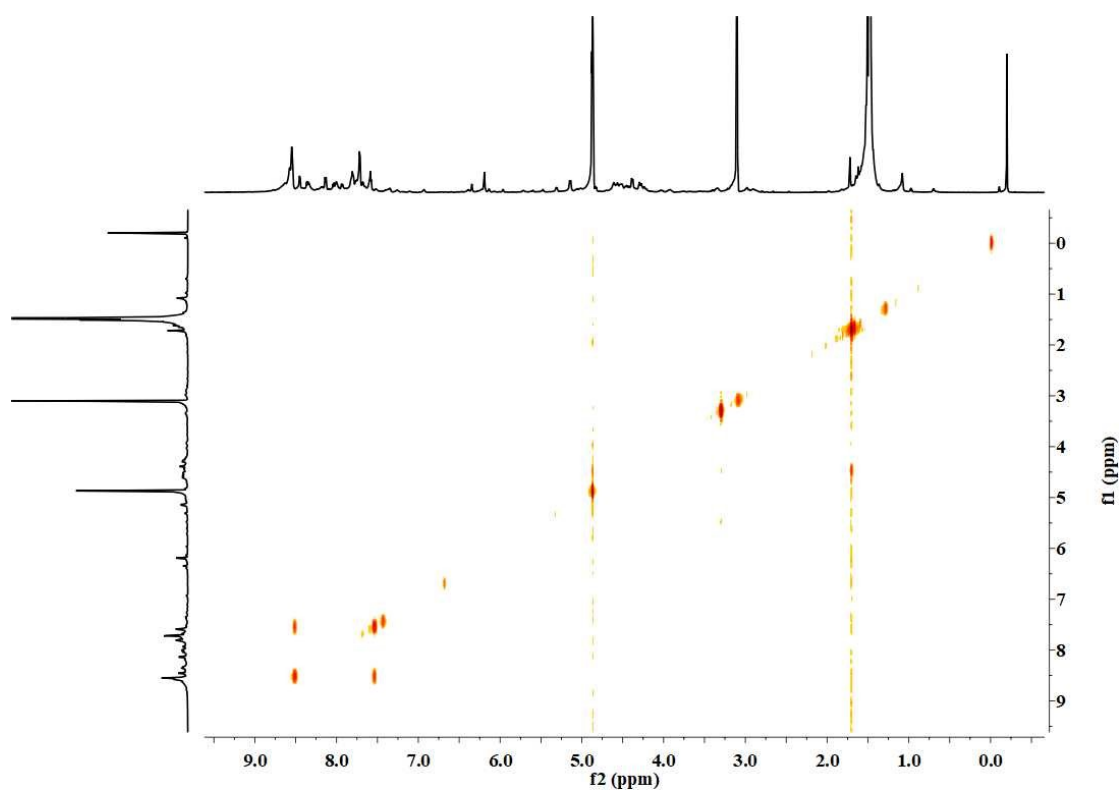

Fig. S28  $^1\text{H}$  -  $^1\text{H}$  COSY NMR spectrum of **3** (600 MHz,  $\text{CD}_3\text{OD}$ , 233K).

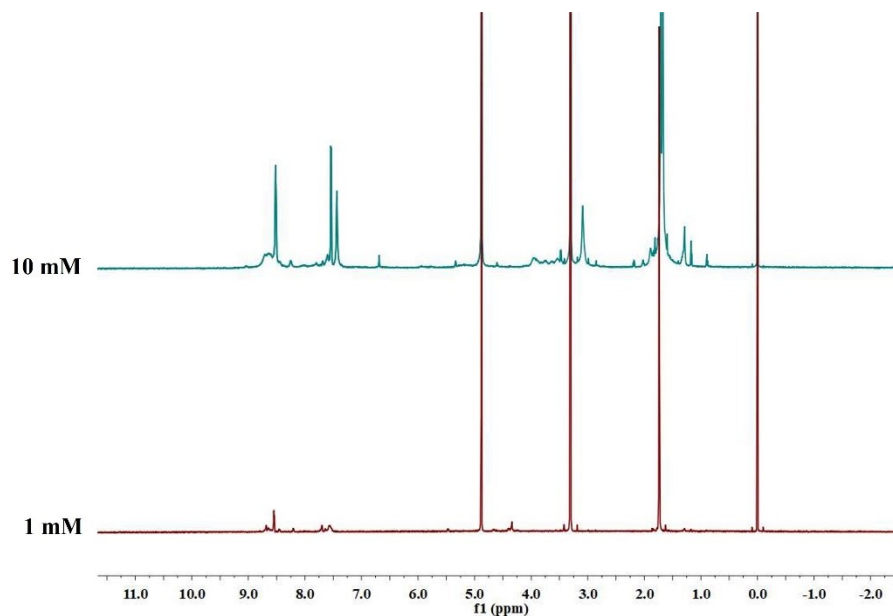

Fig. S29  $^1\text{H}$  NMR (600 MHz,  $\text{CD}_3\text{CN}$ , ppm) for **3** at 10mM and 1mM.

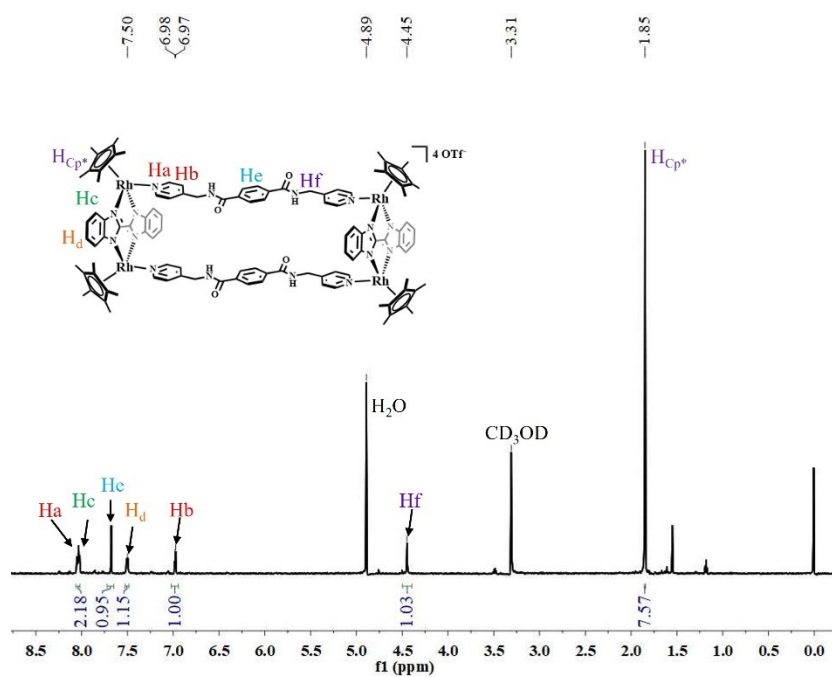

Fig. S30  $^1\text{H}$  NMR (600 MHz,  $\text{CD}_3\text{OD}$ , ppm) for **4**.

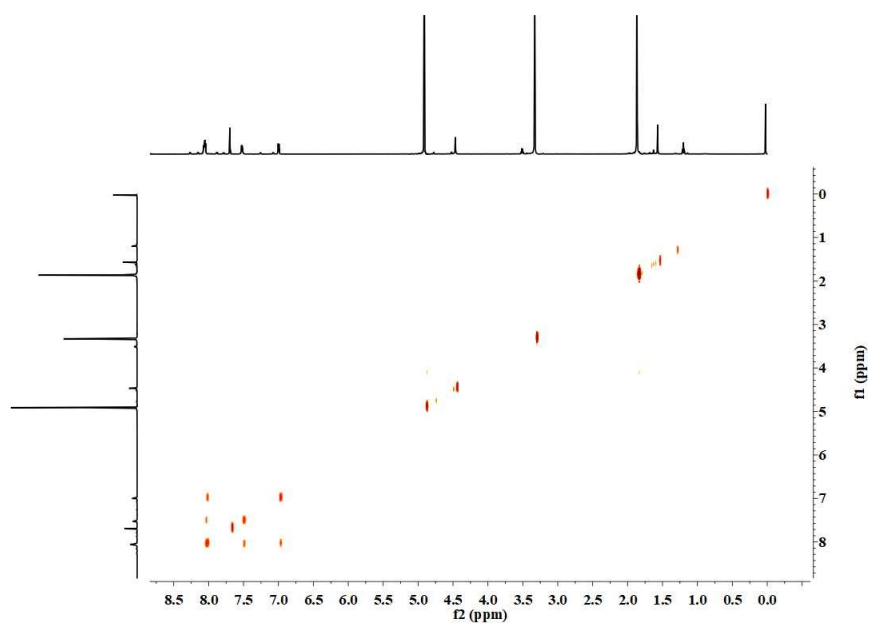

**Fig. S31**  $^1\text{H}$  -  $^1\text{H}$  COSY NMR spectrum of **4** (600 MHz,  $\text{CD}_3\text{OD}$ ).

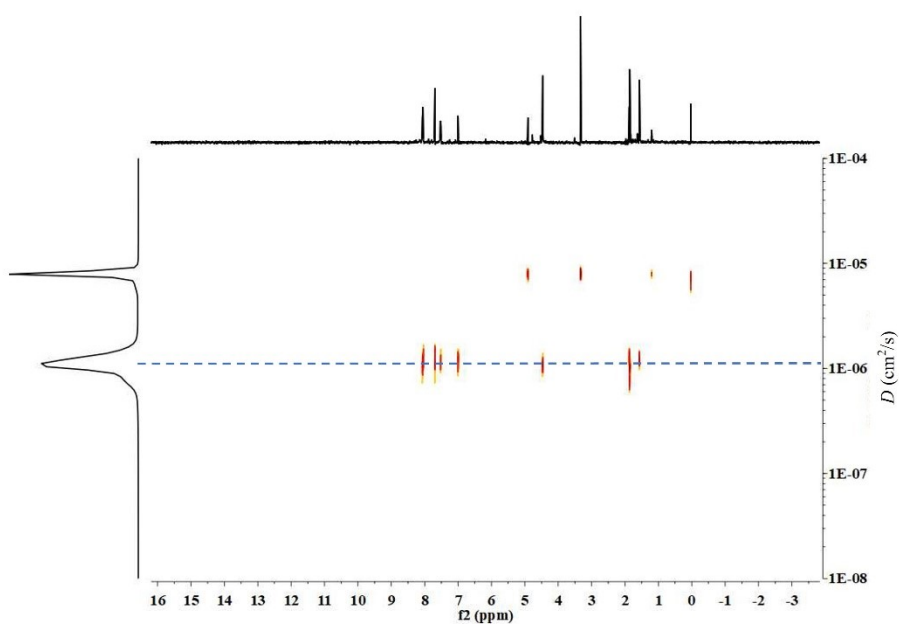

**Fig. S32:**  $^1\text{H}$  DOSY NMR spectrum of **4** (600 MHz,  $\text{CD}_3\text{OD}$ ).

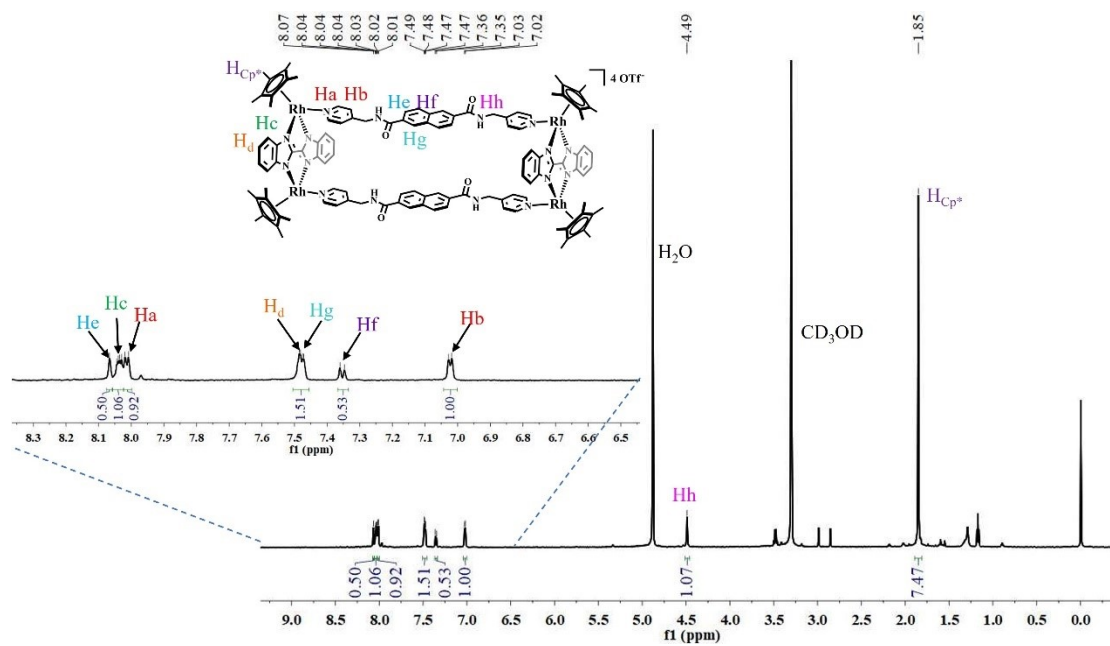

**Fig. S33**  $^1H$  NMR (600 MHz,  $CD_3OD$ , ppm) for **5**.

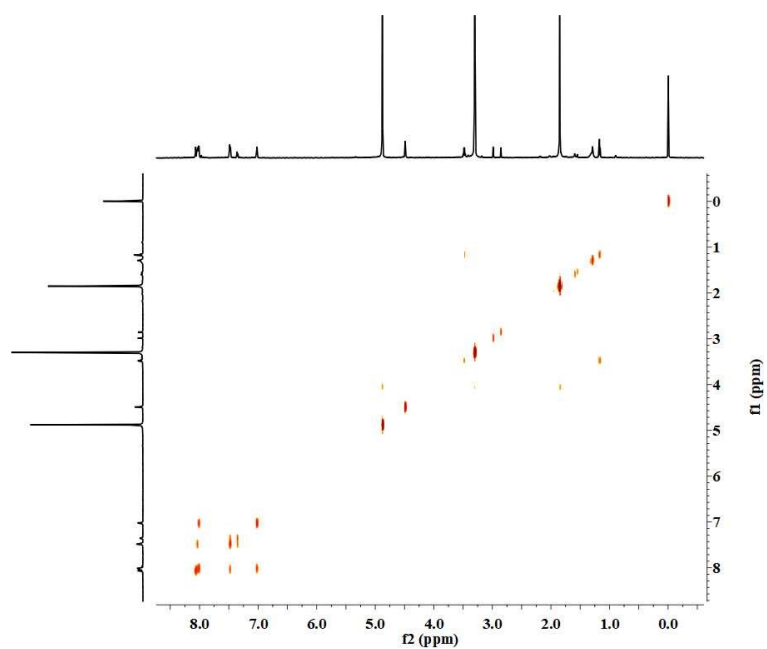

**Fig. S34**  $^1H$  -  $^1H$  COSY NMR spectrum of **5** (600 MHz,  $CD_3OD$ ).

### 3. ESI-MS spectra

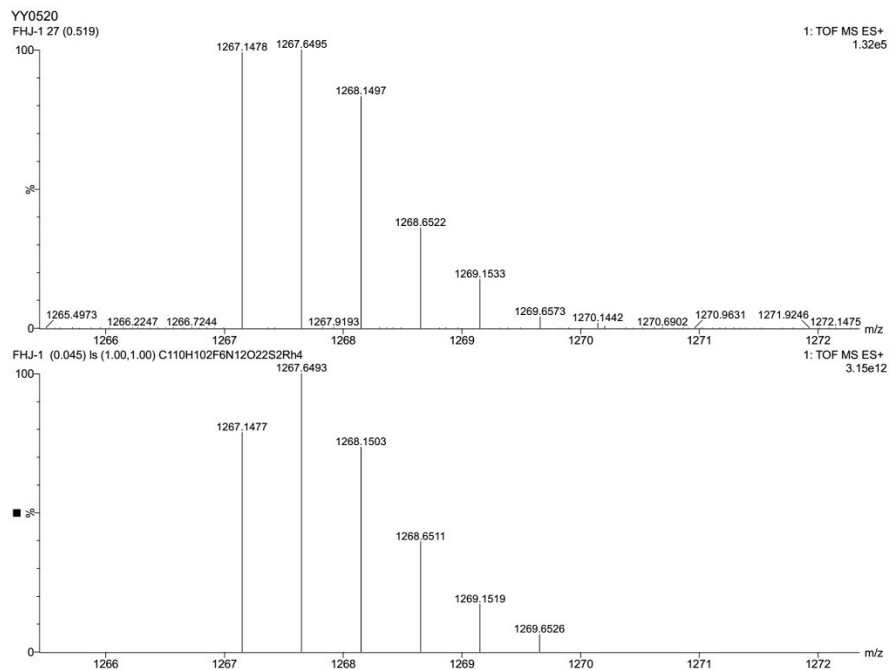

**Fig. S35** Experimental (top) and theoretical (bottom) ESI-MS spectra of  $[1 - 2OTf]^{2+}$ .

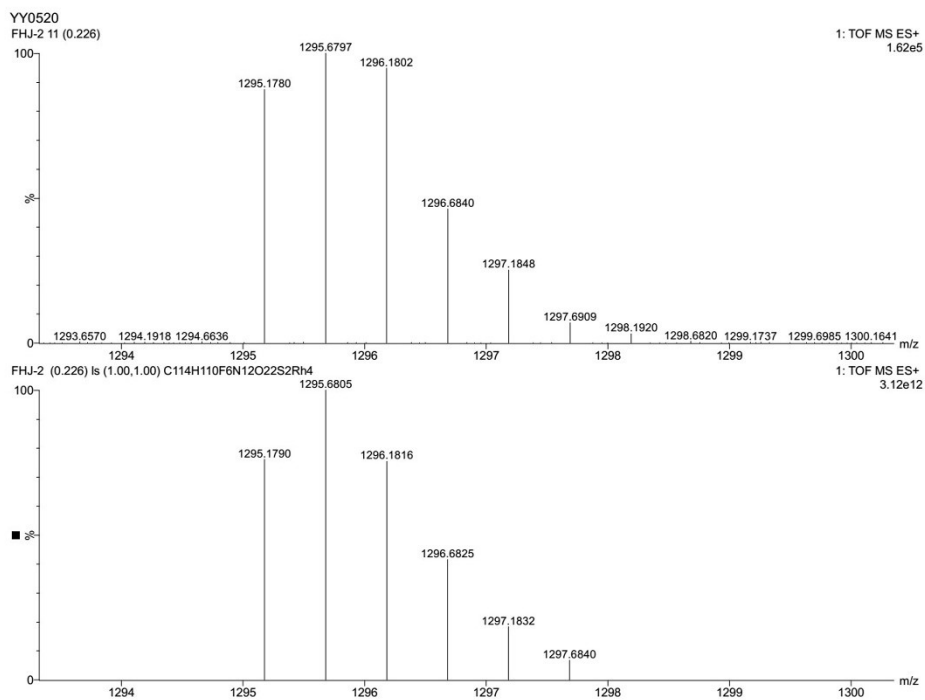

**Fig. S36** Experimental (top) and theoretical (bottom) ESI-MS spectra of  $[2 - 2OTf]^{2+}$ .

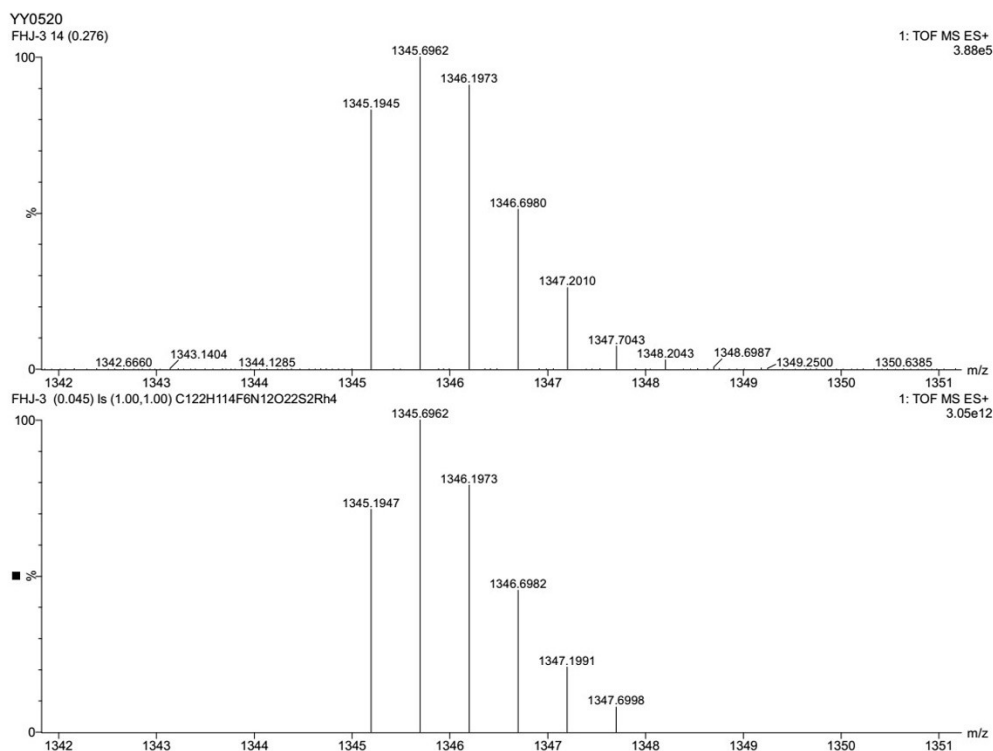

**Fig. S37** Experimental (top) and theoretical (bottom) ESI-MS spectra of  $[3 - 2OTf]^{2+}$ .

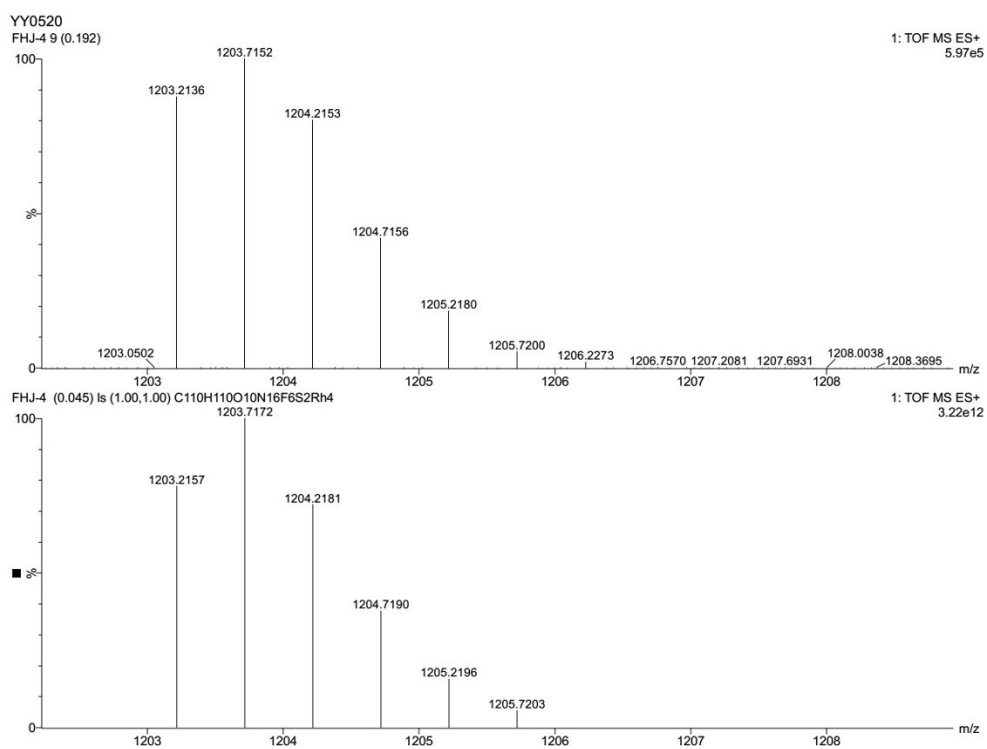

**Fig. S38** Experimental (top) and theoretical (bottom) ESI-MS spectra of  $[4 - 2OTf]^{2+}$ .

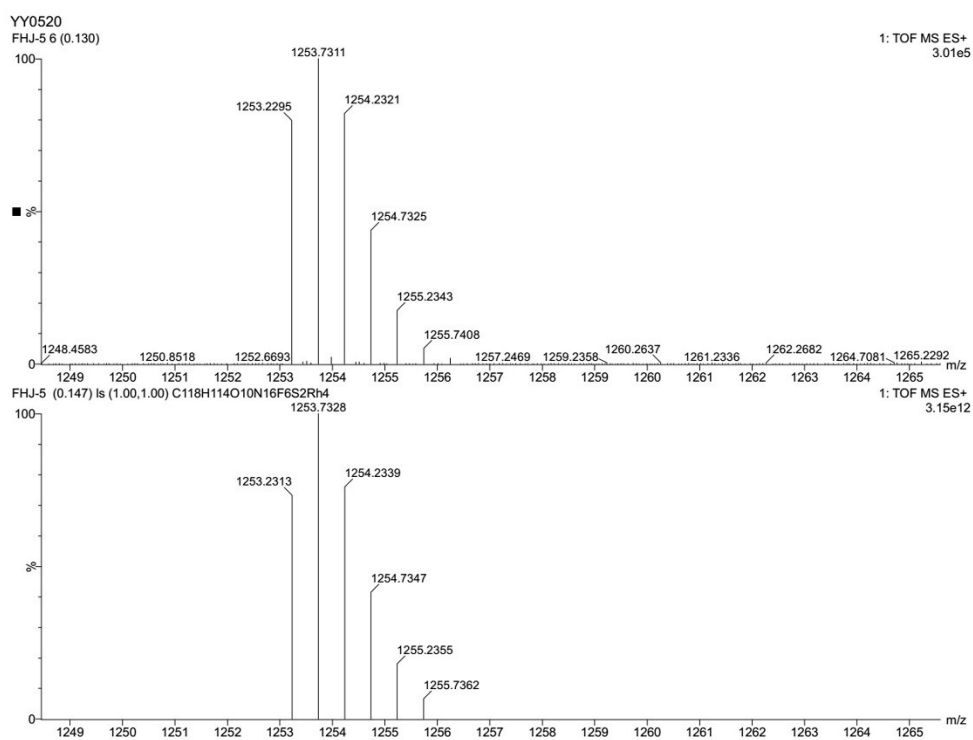

**Fig. S39** Experimental (top) and theoretical (bottom) ESI-MS spectra of  $[5 - 2OTf]^{2+}$ .



#### 4. Near-infrared photothermal conversion research:

##### Experimental details:

To guarantee same amount of conjugated- $\pi$  area, the applied molar ratio of the five topologies **1** / **2** / **3** / **4** / **5** was 1: 1: 1: 2: 2. Compound **1** (8.5 mg, 0.003mmol) was added into CH<sub>3</sub>OH (1.00 ml). After the solid dissolved absolutely, the solution was taken into quartz spectrophotometer cell (1×1×5 cm) and put into the bright spot of a laser with 730 nm wavelength at 0.4 W/cm<sup>2</sup>. Temperature variation of the solution was detected by an infrared camera. Compound **2** (8.7 mg, 0.003 mmol), compound **3** (8.9 mg, 0.003 mmol), Compound **4** (16.2 mg, 0.003 mmol) and compound **5** (16.8 mg, 0.006 mmol) were detected with the same procedure as compound **1**.

Equations used to calculate near-infrared photothermal conversion efficiency were exhibited as follows:

$$\eta = hS(\Delta T_{\text{sample}} - \Delta T_{\text{solvent}}) / I(1-10^{-A}) \quad (1)$$

$$hS = \sum mC_p / \tau_s \quad (2)$$

$$\tau_s = -t / \ln \theta \quad (3)$$

$$\theta = (T_{\text{amb}} - T) / (T_{\text{amb}} - T_{\text{max}}) \quad (4)$$

$\sum mC_p = m(\text{methanol}) \cdot C_p(\text{methanol}) = \rho(\text{methanol}) \cdot V(\text{methanol}) \cdot C_p(\text{methanol}) = 0.777 \times 1.0 \times 2.51 = 1.9503 \text{ J} \cdot \text{K}^{-1}$ .  $\Delta T_{\text{solvent}} = 2.0 \text{ }^\circ\text{C}$ .  $I = 0.4 \text{ W/cm}^2$ .

In the equations 1-4 provided above,  $h$  represents the heat transfer coefficient, while  $S$  stands for the surface area of the container.  $\tau_s$  denotes the time constant of the sample system,  $m$  indicates the mass of the products, and  $C_p$  signifies the specific heat capacity of the solvent.

(1) [2]-catenane **1** (**B-L-L-B**).

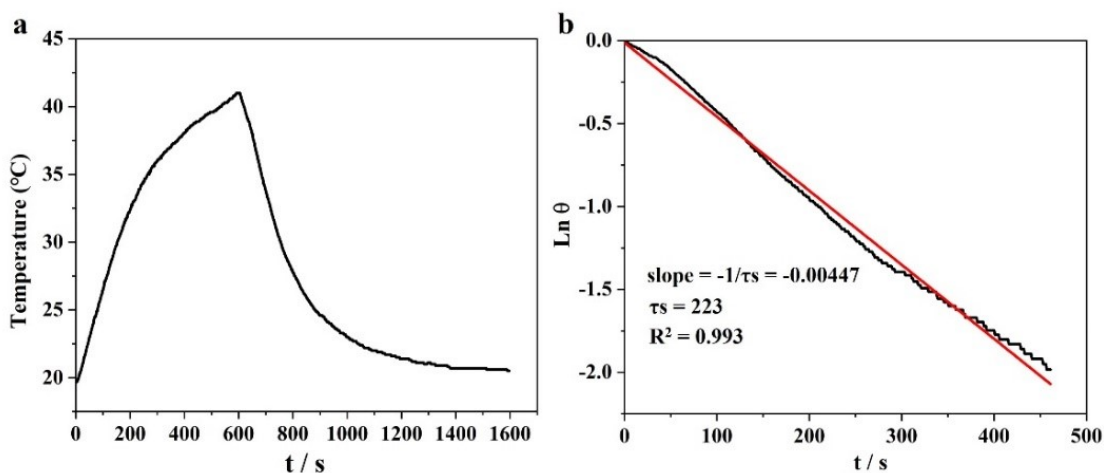

**Fig. S40** (a) Heating and cooling curve of [2]-catenane **1** (with B–L–L–B stacking). (b) Fitting linear of  $\ln\theta$ -t.

Near-infrared photothermal conversion efficiency  $\eta$  of **1** was calculated by equations above. A fitting linear of  $\ln\theta$ -t was obtained by Eqs (3) and (4), by which  $\tau_s$  was calculated as 223 s. Thus,  $hS = 1.9503 / 223 = 8.7457 \times 10^{-3} \text{ J}\cdot\text{K}^{-1}\cdot\text{S}^{-1}$ .  $\Delta T_{\text{sample}} = 21.3 \text{ }^\circ\text{C}$  (41.0 – 19.7, Fig. S26a).  $A1 = 0.5755$  (Fig.5b in main text). Eventually,  $\eta_1 = 8.7457 \times 10^{-3} \times (21.3 - 2.0) / [0.4 \times (1 - 10^{-0.5755})] = 57.0\%$ .

(2) [2]-catenane **2** (B–B–L–L).

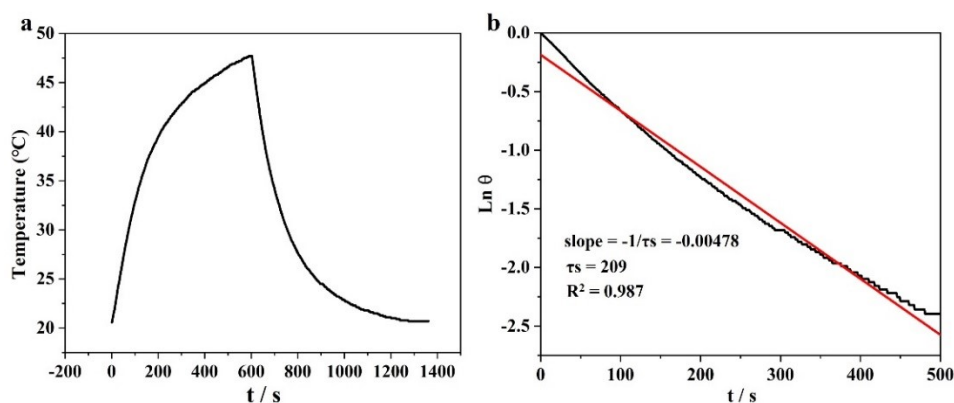

**Fig. S41** (a) Heating and cooling curve of [2]-catenane **2** (with B–B–L–L stacking). (b) Fitting linear of  $\ln\theta$ -t.

Near-infrared photothermal conversion efficiency  $\eta$  of **2** was calculated by equations above. A fitting linear of  $\ln\theta$ -t was obtained by Eqs (3) and (4), by which  $\tau_s$  was calculated as 209 s. Thus,  $hS = 1.9503 / 209 = 9.3316 \times 10^{-3} \text{ J}\cdot\text{K}^{-1}\cdot\text{S}^{-1}$ .  $\Delta T_{\text{sample}} = 27.1 \text{ }^\circ\text{C}$  (47.7 – 20.6, Fig. S27a).  $A1 = 0.6571$  (Fig.5b in main text). Eventually,  $\eta_2 = 9.3316 \times 10^{-3} \times (27.1 - 2.0) / [0.4 \times (1 - 10^{-0.6571})] = 75.0\%$ .

(3) [2]-catenane **3** (L–B–B–L).

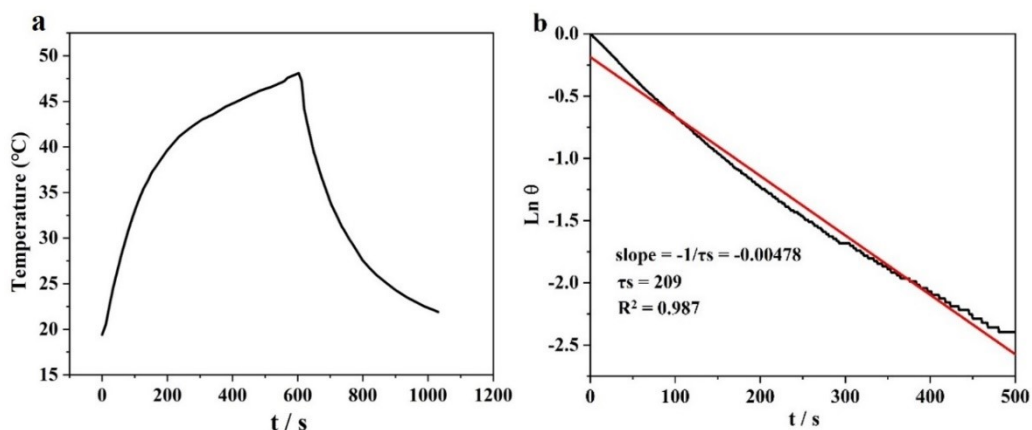

**Fig. S42** (a) Heating and cooling curve of [2]-catenane **3** (with L–B–B–L stacking). (b)

Fitting linear of  $\ln\theta$ - $t$ .

Near-infrared photothermal conversion efficiency  $\eta$  of **3** was calculated by equations above. A fitting linear of  $\ln\theta$ - $t$  was obtained by Eqs (3) and (4), by which  $\tau_s$  was calculated as 193 s. Thus,  $hS = 1.9503 / 193 = 10.1052 \times 10^{-3} \text{ J}\cdot\text{K}^{-1}\cdot\text{S}^{-1}$ .  $\Delta T_{\text{sample}} = 27.6 \text{ }^\circ\text{C}$  (48.1 – 20.5, Fig. S28a).  $A1 = 0.6443$  (Fig.5b in main text). Eventually,  $\eta = 10.1052 \times 10^{-3} \times (27.6 - 2.0) / [0.4 \times (1 - 10^{-0.6443})] = 83.7\%$ .

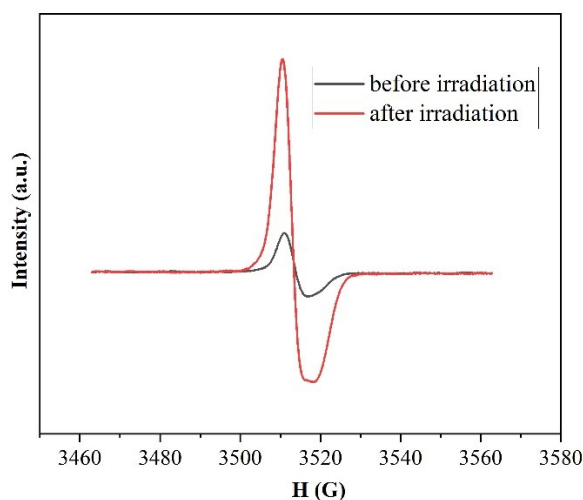

**Fig. S43** EPR spectra of [2]-catenane **1** before and after irradiation.

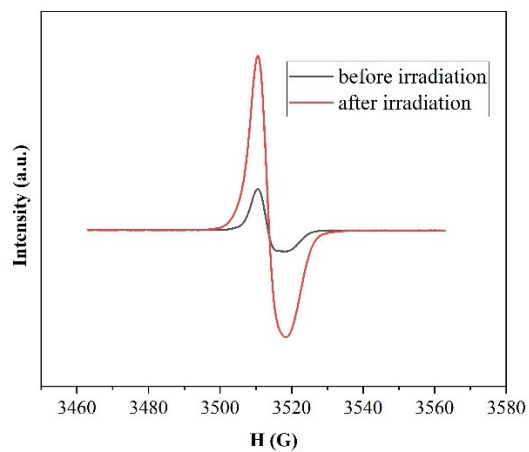

**Fig. S44** EPR spectra of [2]-catenane **2** before and after irradiation.

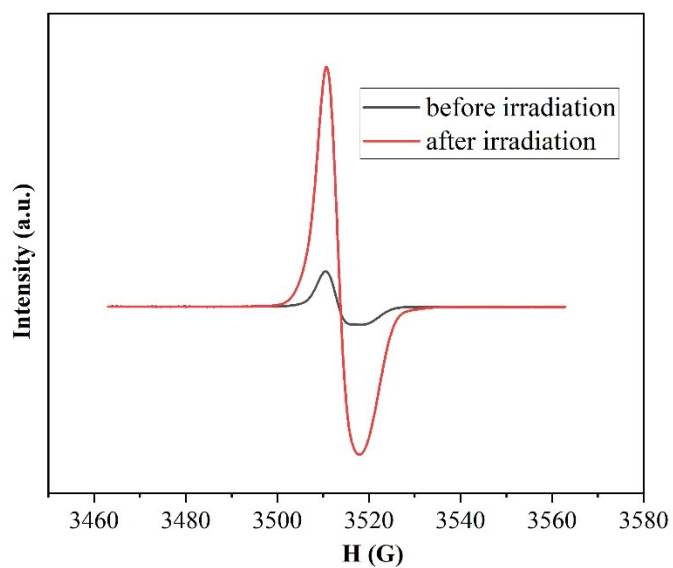

**Fig. S45** EPR spectra of [2]-catenane **3** before and after irradiation.

## 5. X-ray crystallography details

X-ray Crystallography Details. Single crystals of **1**, **2**, **3**, **4** and **5** suitable for X-ray diffraction study were obtained at room temperature. Crystallographic data for complexes **1**, **2**, **3**, **4** and **5** were collected at 173 K with a Bruker D8 VENTURE microfocus X-ray source system (Cu Ka,  $\lambda = 1.54178 \text{ \AA}$ ).

In asymmetric unit of **1**, a solvent mask was calculated and 650 electrons were found in a volume of  $2674 \text{ \AA}^3$  in 2 voids per unit cell. This is consistent with the presence of 1[CH<sub>3</sub>OH], 8[CH<sub>3</sub>OH] per Asymmetric Unit which account for 648 electrons per unit cell.

In asymmetric unit of **2**, a solvent mask was calculated and 534 electrons were found in a volume of  $1464 \text{ \AA}^3$  in 3 voids per unit cell. This is consistent with the presence of 6[CH<sub>3</sub>OH], 1[H<sub>2</sub>O], 1[H<sub>2</sub>O] per Asymmetric Unit which account for 512 electrons per unit cell.

In asymmetric unit of **3**, a solvent mask was calculated and 250 electrons were found in a volume of  $792 \text{ \AA}^3$  in 2 voids per unit cell. This is consistent with the presence of 1[C<sub>3</sub>H<sub>7</sub>NO], 1[CH<sub>3</sub>OH] per Asymmetric Unit which account for 232 electrons per unit cell.

In asymmetric unit of **4**, a solvent mask was calculated and 114 electrons were found in a volume of  $443 \text{ \AA}^3$  in 3 voids per unit cell. This is consistent with the presence of 2[C<sub>3</sub>H<sub>7</sub>NO], 2.8[H<sub>2</sub>O] per Asymmetric Unit which account for 108 electrons per unit cell.

In asymmetric unit of **5**, a solvent mask was calculated and 829 electrons were found in a volume of  $1976 \text{ \AA}^3$  in 1 void per unit cell. This is consistent with the presence of 22[CH<sub>3</sub>OH] per Asymmetric Unit which account for 792 electrons per unit cell.

**Table S1.** Crystal data for complex **1**.

| Complex                           | 1                                                                                                                |
|-----------------------------------|------------------------------------------------------------------------------------------------------------------|
| Empirical formula                 | C <sub>121</sub> H <sub>140</sub> F <sub>12</sub> N <sub>12</sub> O <sub>37</sub> Rh <sub>4</sub> S <sub>4</sub> |
| Formula weight                    | 3122.32                                                                                                          |
| Temperature                       | 173.00 K                                                                                                         |
| Wavelength                        | 1.34138 Å                                                                                                        |
| Crystal system                    | Monoclinic                                                                                                       |
| Space group                       | P 1 21/n 1                                                                                                       |
| Unit cell dimensions              | a = 13.9735(8) Å<br>b = 53.355(3) Å<br>c = 17.4998(10) Å                                                         |
| Volume                            | 13039.4(13) Å <sup>3</sup>                                                                                       |
| Z                                 | 4                                                                                                                |
| Density (calculated)              | 1.590 Mg/m <sup>3</sup>                                                                                          |
| Absorption coefficient            | 3.689 mm <sup>-1</sup>                                                                                           |
| F(000)                            | 6392                                                                                                             |
| Crystal size                      | 0.3 x 0.2 x 0.2 mm <sup>3</sup>                                                                                  |
| Theta range for data collection   | 2.628 to 54.959°.                                                                                                |
| Index ranges                      | -16<=h<=17, -65<=k<=64, -21<=l<=21                                                                               |
| Reflections collected             | 87383                                                                                                            |
| Independent reflections           | 24709 [R(int) = 0.0503]                                                                                          |
| Completeness to theta = 53.594°   | 99.7 %                                                                                                           |
| Absorption correction             | Semi-empirical from equivalents                                                                                  |
| Max. and min. transmission        | 0.7508 and 0.4981                                                                                                |
| Refinement method                 | Full-matrix least-squares on F <sup>2</sup>                                                                      |
| Data / restraints / parameters    | 24709 / 1752 / 1569                                                                                              |
| Goodness-of-fit on F <sup>2</sup> | 1.027                                                                                                            |
| Final R indices [I>2sigma(I)]     | R1 = 0.0693, wR2 = 0.1839                                                                                        |
| R indices (all data)              | R1 = 0.0881, wR2 = 0.1988                                                                                        |
| Extinction coefficient            | n/a                                                                                                              |
| Largest diff. peak and hole       | 1.907 and -1.725 e.Å <sup>-3</sup>                                                                               |

[α] : R<sub>1</sub>=Σ||F<sub>o</sub>|-|F<sub>c</sub>||/Σ|F<sub>o</sub>| (based on reflections with F<sub>o</sub><sup>2</sup>>2σF<sup>2</sup>). wR<sub>2</sub>=[Σ[w(F<sub>o</sub><sup>2</sup>-F<sub>c</sub><sup>2</sup>)<sup>2</sup>]/Σ[w(F<sub>o</sub><sup>2</sup>)<sup>2</sup>]]<sup>1/2</sup>;  
w=1/[σ<sup>2</sup>(F<sub>o</sub><sup>2</sup>)+(0.095P)<sup>2</sup>]; P=[max(F<sub>o</sub><sup>2</sup>, 0)+2F<sub>c</sub><sup>2</sup>]/3(F<sub>o</sub><sup>2</sup>>2σF<sup>2</sup>).

**Table S2.** Crystal data for complex 2.

| Complex                           | 2                                                                                                                |
|-----------------------------------|------------------------------------------------------------------------------------------------------------------|
| Empirical formula                 | C <sub>125</sub> H <sub>151</sub> F <sub>12</sub> N <sub>12</sub> O <sub>39</sub> Rh <sub>4</sub> S <sub>4</sub> |
| Formula weight                    | 3213.45                                                                                                          |
| Temperature                       | 173.00 K                                                                                                         |
| Wavelength                        | 1.34139 Å                                                                                                        |
| Crystal system                    | Monoclinic                                                                                                       |
| Space group                       | P 1 21/c 1                                                                                                       |
| Unit cell dimensions              | a = 22.9933(18) Å<br>b = 21.6473(17) Å<br>c = 26.969(2) Å                                                        |
| Volume                            | 13236.0(18) Å <sup>3</sup>                                                                                       |
| Z                                 | 4                                                                                                                |
| Density (calculated)              | 1.613 Mg/m <sup>3</sup>                                                                                          |
| Absorption coefficient            | 3.653 mm <sup>-1</sup>                                                                                           |
| F(000)                            | 6596                                                                                                             |
| Crystal size                      | 0.3 x 0.3 x 0.1 mm <sup>3</sup>                                                                                  |
| Theta range for data collection   | 2.702 to 53.326°.                                                                                                |
| Index ranges                      | -27<=h<=26, -20<=k<=25, -31<=l<=31                                                                               |
| Reflections collected             | 101492                                                                                                           |
| Independent reflections           | 23323 [R(int) = 0.1191]                                                                                          |
| Completeness to theta = 53.326°   | 98.4 %                                                                                                           |
| Absorption correction             | Semi-empirical from equivalents                                                                                  |
| Max. and min. transmission        | 0.7504 and 0.2686                                                                                                |
| Refinement method                 | Full-matrix least-squares on F <sup>2</sup>                                                                      |
| Data / restraints / parameters    | 23323 / 1871 / 1613                                                                                              |
| Goodness-of-fit on F <sup>2</sup> | 1.111                                                                                                            |
| Final R indices [I>2sigma(I)]     | R1 = 0.1325, wR2 = 0.2618                                                                                        |
| R indices (all data)              | R1 = 0.1741, wR2 = 0.2817                                                                                        |
| Extinction coefficient            | n/a                                                                                                              |
| Largest diff. peak and hole       | 2.433 and -1.537 e.Å <sup>-3</sup>                                                                               |

[α] : R<sub>1</sub>=Σ||F<sub>o</sub>|-|F<sub>c</sub>||/Σ|F<sub>o</sub>| (based on reflections with F<sub>o</sub><sup>2</sup>>2σF<sup>2</sup>). wR<sub>2</sub>=[Σ[w(F<sub>o</sub><sup>2</sup>-F<sub>c</sub><sup>2</sup>)<sup>2</sup>]/Σ[w(F<sub>o</sub><sup>2</sup>)<sup>2</sup>]]<sup>1/2</sup>;  
w=1/[σ<sup>2</sup>(F<sub>o</sub><sup>2</sup>)+(0.095P)<sup>2</sup>]; P=[max(F<sub>o</sub><sup>2</sup>, 0)+2F<sub>c</sub><sup>2</sup>]/3(F<sub>o</sub><sup>2</sup>>2σF<sup>2</sup>).

**Table S3.** Crystal data for complex 3.

| Complex                           | 3                                                                                                               |
|-----------------------------------|-----------------------------------------------------------------------------------------------------------------|
| Empirical formula                 | C <sub>67</sub> H <sub>73</sub> F <sub>6</sub> N <sub>7</sub> O <sub>15.63</sub> Rh <sub>2</sub> S <sub>2</sub> |
| Formula weight                    | 1610.32                                                                                                         |
| Temperature                       | 173.00 K                                                                                                        |
| Wavelength                        | 1.34139 Å                                                                                                       |
| Crystal system                    | Orthorhombic                                                                                                    |
| Space group                       | P2 <sub>1</sub> 2 <sub>1</sub> 2                                                                                |
| Unit cell dimensions              | a = 28.7856(8) Å<br>b = 14.4874(4) Å<br>c = 15.6484(4) Å                                                        |
| Volume                            | 6525.8(3) Å <sup>3</sup>                                                                                        |
| Z                                 | 4                                                                                                               |
| Density (calculated)              | 1.639 Mg/m <sup>3</sup>                                                                                         |
| Absorption coefficient            | 3.681 mm <sup>-1</sup>                                                                                          |
| F(000)                            | 3300                                                                                                            |
| Crystal size                      | 0.21 x 0.19 x 0.17 mm <sup>3</sup>                                                                              |
| Theta range for data collection   | 2.971 to 52.982°.                                                                                               |
| Index ranges                      | -34 ≤ h ≤ 34, -17 ≤ k ≤ 15, -18 ≤ l ≤ 18                                                                        |
| Reflections collected             | 53732                                                                                                           |
| Independent reflections           | 11508 [R(int) = 0.0544]                                                                                         |
| Completeness to theta = 52.982°   | 99.8 %                                                                                                          |
| Absorption correction             | Semi-empirical from equivalents                                                                                 |
| Max. and min. transmission        | 0.7512 and 0.3544                                                                                               |
| Refinement method                 | Full-matrix least-squares on F <sup>2</sup>                                                                     |
| Data / restraints / parameters    | 11508 / 926 / 859                                                                                               |
| Goodness-of-fit on F <sup>2</sup> | 1.038                                                                                                           |
| Final R indices [I > 2σ(I)]       | R1 = 0.0656, wR2 = 0.1737                                                                                       |
| R indices (all data)              | R1 = 0.0759, wR2 = 0.1853                                                                                       |
| Absolute structure parameter      | 0.47(2)                                                                                                         |
| Extinction coefficient            | n/a                                                                                                             |
| Largest diff. peak and hole       | 1.181 and -1.583 e.Å <sup>-3</sup>                                                                              |

[α] : R<sub>1</sub> = Σ||F<sub>o</sub>|-|F<sub>c</sub>||/Σ|F<sub>o</sub>| (based on reflections with F<sub>o</sub><sup>2</sup> > 2σF<sub>o</sub><sup>2</sup>). wR<sub>2</sub> = [Σ[w(F<sub>o</sub><sup>2</sup>-F<sub>c</sub><sup>2</sup>)<sup>2</sup>]/Σ[w(F<sub>o</sub><sup>2</sup>)<sup>2</sup>]]<sup>1/2</sup>;  
w = 1/[σ<sup>2</sup>(F<sub>o</sub><sup>2</sup>) + (0.095P)<sup>2</sup>]; P = [max(F<sub>o</sub><sup>2</sup>, 0) + 2F<sub>c</sub><sup>2</sup>]/3(F<sub>o</sub><sup>2</sup> > 2σF<sub>o</sub><sup>2</sup>).

**Table S4.** Crystal data for complex 4.



| Complex                           | 4                                                                                                                      |
|-----------------------------------|------------------------------------------------------------------------------------------------------------------------|
| Empirical formula                 | C <sub>118</sub> H <sub>131.60</sub> F <sub>12</sub> N <sub>18</sub> O <sub>20.80</sub> Rh <sub>4</sub> S <sub>4</sub> |
| Formula weight                    | 2902.68                                                                                                                |
| Temperature                       | 173.00 K                                                                                                               |
| Wavelength                        | 1.34139 Å                                                                                                              |
| Crystal system                    | Triclinic                                                                                                              |
| Space group                       | P-1                                                                                                                    |
| Unit cell dimensions              | a = 12.7842(9) Å<br>b = 13.3300(10) Å<br>c = 20.9500(15) Å                                                             |
| Volume                            | 3148.9(4) Å <sup>3</sup>                                                                                               |
| Z                                 | 1                                                                                                                      |
| Density (calculated)              | 1.531 Mg/m <sup>3</sup>                                                                                                |
| Absorption coefficient            | 3.728 mm <sup>-1</sup>                                                                                                 |
| F(000)                            | 1484                                                                                                                   |
| Crystal size                      | 0.2 x 0.2 x 0.2 mm <sup>3</sup>                                                                                        |
| Theta range for data collection   | 3.114 to 55.104°.                                                                                                      |
| Index ranges                      | -15 ≤ h ≤ 14, -16 ≤ k ≤ 16, -25 ≤ l ≤ 25                                                                               |
| Reflections collected             | 28559                                                                                                                  |
| Independent reflections           | 11723 [R(int) = 0.0788]                                                                                                |
| Completeness to theta = 53.594°   | 98.1 %                                                                                                                 |
| Absorption correction             | Semi-empirical from equivalents                                                                                        |
| Max. and min. transmission        | 0.7508 and 0.2888                                                                                                      |
| Refinement method                 | Full-matrix least-squares on F <sup>2</sup>                                                                            |
| Data / restraints / parameters    | 11723 / 803 / 763                                                                                                      |
| Goodness-of-fit on F <sup>2</sup> | 1.059                                                                                                                  |
| Final R indices [I > 2σ(I)]       | R1 = 0.1046, wR2 = 0.2091                                                                                              |
| R indices (all data)              | R1 = 0.1528, wR2 = 0.2365                                                                                              |
| Extinction coefficient            | n/a                                                                                                                    |
| Largest diff. peak and hole       | 2.094 and -1.821 e.Å <sup>-3</sup>                                                                                     |

[α] : R<sub>1</sub> = Σ||F<sub>o</sub>|-|F<sub>c</sub>||/Σ|F<sub>o</sub>| (based on reflections with F<sub>o</sub><sup>2</sup> > 2σF<sup>2</sup>). wR<sub>2</sub> = [Σ[w(F<sub>o</sub><sup>2</sup>-F<sub>c</sub><sup>2</sup>)<sup>2</sup>]/Σ[w(F<sub>o</sub><sup>2</sup>)<sup>2</sup>]<sup>1/2</sup>;  
w = 1/[σ<sup>2</sup>(F<sub>o</sub><sup>2</sup>) + (0.095P)<sup>2</sup>]; P = [max(F<sub>o</sub><sup>2</sup>, 0) + 2F<sub>c</sub><sup>2</sup>]/3(F<sub>o</sub><sup>2</sup> > 2σF<sup>2</sup>).

**Table S5.** Crystal data for complex 5.

| Complex                           | 5                                                                                                               |
|-----------------------------------|-----------------------------------------------------------------------------------------------------------------|
| Empirical formula                 | C <sub>140</sub> H <sub>204</sub> F <sub>6</sub> N <sub>16</sub> O <sub>32</sub> Rh <sub>4</sub> S <sub>2</sub> |
| Formula weight                    | 3212.94                                                                                                         |
| Temperature                       | 173.00 K                                                                                                        |
| Wavelength                        | 1.34139 Å                                                                                                       |
| Crystal system                    | Monoclinic                                                                                                      |
| Space group                       | P 1 21/n 1                                                                                                      |
| Unit cell dimensions              | a = 13.7998(11) Å<br>b = 32.678(3) Å<br>c = 16.4748(13) Å                                                       |
| Volume                            | 6898.8(10) Å <sup>3</sup>                                                                                       |
| Z                                 | 2                                                                                                               |
| Density (calculated)              | 1.547 Mg/m <sup>3</sup>                                                                                         |
| Absorption coefficient            | 3.254 mm <sup>-1</sup>                                                                                          |
| F(000)                            | 3356                                                                                                            |
| Crystal size                      | 0.19 x 0.17 x 0.15 mm <sup>3</sup>                                                                              |
| Theta range for data collection   | 3.223 to 52.093°.                                                                                               |
| Index ranges                      | -16<=h<=16, -38<=k<=38, -19<=l<=15                                                                              |
| Reflections collected             | 48986                                                                                                           |
| Independent reflections           | 11647 [R(int) = 0.0585]                                                                                         |
| Completeness to theta = 52.093°   | 99.0 %                                                                                                          |
| Absorption correction             | Semi-empirical from equivalents                                                                                 |
| Max. and min. transmission        | 0.7505 and 0.3635                                                                                               |
| Refinement method                 | Full-matrix least-squares on F <sup>2</sup>                                                                     |
| Data / restraints / parameters    | 11647 / 878 / 713                                                                                               |
| Goodness-of-fit on F <sup>2</sup> | 1.068                                                                                                           |
| Final R indices [I>2sigma(I)]     | R1 = 0.1007, wR2 = 0.2014                                                                                       |
| R indices (all data)              | R1 = 0.1260, wR2 = 0.2172                                                                                       |
| Extinction coefficient            | n/a                                                                                                             |
| Largest diff. peak and hole       | 2.611 and -1.519 e.Å <sup>-3</sup>                                                                              |

[α] : R<sub>1</sub>=Σ||F<sub>o</sub>|-|F<sub>c</sub>||/Σ|F<sub>o</sub>| (based on reflections with F<sub>o</sub><sup>2</sup>>2σF<sup>2</sup>). wR<sub>2</sub>=[Σ[w(F<sub>o</sub><sup>2</sup>-F<sub>c</sub><sup>2</sup>)<sup>2</sup>]/Σ[w(F<sub>o</sub><sup>2</sup>)<sup>2</sup>]<sup>1/2</sup>;  
w=1/[σ<sup>2</sup>(F<sub>o</sub><sup>2</sup>)+(0.095P)<sup>2</sup>]; P=[max(F<sub>o</sub><sup>2</sup>, 0)+2F<sub>c</sub><sup>2</sup>]/3(F<sub>o</sub><sup>2</sup>>2σF<sup>2</sup>).
